# Supplementary material
Source: publisher figshare collection journal article supplement (https://acs.figshare.com/ndownloader/files/4506049)

**One-Pot Facile Synthesis of Substituted Isoindolinones via an Ugi  
Four-Component Condensation/Diels-Alder Cycloaddition/  
Deselenization-Aromatization Sequence**

Xian Huang<sup>\*,†,‡</sup>, Jianfeng Xu<sup>†</sup>

<sup>†</sup>Department of Chemistry, Zhejiang University (Xixi Campus), Hangzhou  
310028, P. R. China

<sup>‡</sup>State Key Laboratory of Organometallic Chemistry, Shanghai Institute of  
Organic Chemistry, Chinese Academy of Sciences, Shanghai 200032, P. R. China

[huangx@mail.hz.zj.cn](mailto:huangx@mail.hz.zj.cn)

**Supporting Information**

**List of contents**

|                                                    |     |
|----------------------------------------------------|-----|
| Experiment procedures                              | S2  |
| Characterization data:                             |     |
| <b>10a-10o</b>                                     | S4  |
| <sup>1</sup> H NMR and <sup>13</sup> C NMR spectra | S10 |

## 1. Experiment procedures

### General Methods.

Melting points were uncorrected.  $\text{CH}_2\text{Cl}_2$  was distilled from  $\text{CaH}_2$  immediately prior to use. Petroleum ether refers to the fraction with boiling point in the range 60–90 °C. All  $^1\text{H}$  NMR (400 MHz) and  $^{13}\text{C}$  NMR (100 MHz) spectra were measured in  $\text{CDCl}_3$  with TMS as internal standard. Chemical shifts are expressed in ppm and J values are given in Hz.

### General Procedure.

#### Synthesis of 2-(Phenylselanyl)acrylic acids 7a.

Phenylselenenyl bromide (5.0 mmol) was dissolved in  $\text{CH}_2\text{Cl}_2$  (20 mL), methyl acrylate (10 mmol) was added and the reaction mixture was stirred at 25 °C for 0.5 h. Then triethylamine (10 mmol) was added and the reaction mixture was stirred at 25 °C for another 1 h. The precipitate was filtered and the filtrate was concentrated. The residue was purified by flash chromatography (petroleum ether/ethyl acetate 9:1 v/v) to give methyl 2-(phenylselanyl)acrylate in 87% yield (4.35 mmol).

KOH-water solution (0.5M, 13 mL) was added to Methyl 2-(phenylselanyl)acrylate (4.35 mmol), this mixture was stirred overnight at 25 °C. Ether (20 mL) was added to the mixture and the layers were separated, the aqueous layer was extracted with ether ( $2 \times 15$  mL), then 3N HCl was added to the aqueous layer to acidify it to PH=2~3. Ether (20 mL) was added to the aqueous layer and the layers were separated, the aqueous layer was extracted with ether ( $2 \times 15$  mL), The combined organic layers were washed with brine, dried over  $\text{Na}_2\text{SO}_4$ , and evaporated to afford 2-(phenylselanyl)acrylic acid in 92% yield (4.0 mmol).

### General Procedure for Synthesis of Isoindolinones **10**.

A 2-furaldehyde **5** (1.0 mmol), a primary amine **6** (1.2 mmol), a 2-(phenylselanyl)acrylic acid **7** (1.0 mmol) and an isocyanide **8** (1.0 mmol) were combined in methanol (4 mL), the reaction mixture was stirred at 25 °C for 16 h (For **10e**, **10f**, **10g**, **10h**, **10n** and **10o**, the reaction mixture was stirred at 25 °C for 12 h then reflux for 8 h. For **10b**, **10i**, **10j** and **10m**, the reaction mixture was stirred at 25 °C for 12 h then reflux for 24 h.). Then methanol was evaporated and anhydrous CH<sub>2</sub>Cl<sub>2</sub> (5mL) and BF<sub>3</sub>-OEt<sub>2</sub> (2.0 mmol) was added, stirring was continued at 25 °C for an additional 2 h before the reaction was quenched by adding sat. aq NaHCO<sub>3</sub> (20 mL). The layers were separated and the aqueous layer was extracted with CH<sub>2</sub>Cl<sub>2</sub> (2 × 15 mL). The combined organic layers were washed with brine, dried over Na<sub>2</sub>SO<sub>4</sub>, and evaporated. The residue was purified by flash chromatography (petroleum ether/ethyl acetate 2:1 v/v) to give the product **10**.

## 2. Characterization data:

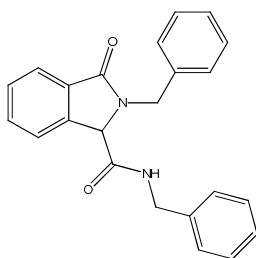

### ***N*,2-dibenzyl-3-oxoisindoline-1-carboxamide (10a)**

pale solid, mp 169-171 °C.  $^1\text{H}$  NMR (400 MHz,  $\text{CDCl}_3$ )  $\delta$  7.59 (1H, d,  $J = 7.2$  Hz), 7.48-7.51 (1H, m), 7.40 (1H, br, 1H of NH), 7.15-7.34 (12H, m), 5.24 (1H, d,  $J = 14.8$  Hz, 1H of  $\text{CH}_2$ ), 4.88 (1H, s, 1H of CH), 4.44 (1H, dd,  $J_1 = 14.8$  Hz,  $J_2 = 6.0$  Hz, 1H of  $\text{CH}_2$ ), 4.38 (1H, dd,  $J_1 = 14.8$  Hz,  $J_2 = 6.0$  Hz, 1H of  $\text{CH}_2$ ), 4.17 (1H, d,  $J = 14.8$  Hz, 1H of  $\text{CH}_2$ );  $^{13}\text{C}$  NMR (100 MHz,  $\text{CDCl}_3$ )  $\delta$  169.5, 167.5, 141.2, 138.0, 135.9, 132.2, 130.4, 128.9, 128.6, 128.4, 128.0, 127.7, 127.4, 123.7, 112.7, 64.1, 45.6, 43.4; MS (EI)  $m/z$  356 ( $\text{M}^+$ ); IR  $\nu_{\text{max}}$  ( $\text{cm}^{-1}$ ) 1695, 1664, 1541, 1397, 1241, 740, 699; HRMS (EI):  $m/z$  calcd for  $\text{C}_{23}\text{H}_{20}\text{N}_2\text{O}_2$  ( $\text{M}^+$ ): 356.1525; Found: 356.1522.

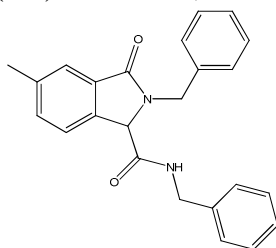

### ***N*,2-dibenzyl-5-methyl-3-oxoisindoline-1-carboxamide (10b)**

pale solid, mp 101-103 °C.  $^1\text{H}$  NMR (400 MHz,  $\text{CDCl}_3$ )  $\delta$  7.68 (1H, br, 1H of NH), 7.45 (1H, d,  $J = 7.6$  Hz), 7.19-7.28 (11H, m), 6.89 (1H, s), 5.27 (1H, d,  $J = 15.2$  Hz, 1H of  $\text{CH}_2$ ), 4.84 (1H, s, 1H of CH), 4.46 (1H, dd,  $J_1 = 14.4$  Hz,  $J_2 = 6.0$  Hz, 1H of  $\text{CH}_2$ ), 4.40 (1H, dd,  $J_1 = 15.2$  Hz,  $J_2 = 6.4$  Hz, 1H of  $\text{CH}_2$ ), 4.16 (1H, d,  $J = 14.8$  Hz, 1H of  $\text{CH}_2$ ), 2.18 (3H, s, 3H of  $\text{CH}_3$ );  $^{13}\text{C}$  NMR (100 MHz,  $\text{CDCl}_3$ )  $\delta$  169.6, 167.8, 138.9, 138.5, 138.2, 136.0, 133.2, 130.5, 128.9, 128.5, 128.4, 127.9, 127.8, 127.4, 123.8, 122.3, 63.9, 45.5, 43.4, 21.1; MS (EI)  $m/z$  370 ( $\text{M}^+$ ); IR  $\nu_{\text{max}}$  ( $\text{cm}^{-1}$ ) 1693, 1661, 1543, 1396, 1237, 738, 699; HRMS (EI):  $m/z$  calcd for  $\text{C}_{24}\text{H}_{22}\text{N}_2\text{O}_2$  ( $\text{M}^+$ ): 370.1681; Found: 370.1685.

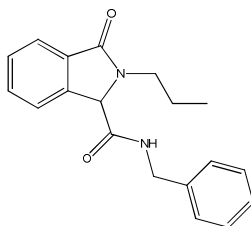

### ***N*-benzyl-3-oxo-2-propylisindoline-1-carboxamide (10c)**

pale solid, mp 113-115 °C.  $^1\text{H}$  NMR (400 MHz,  $\text{CDCl}_3$ )  $\delta$  7.70 (1H, br, 1H of NH), 7.63 (1H, d,  $J = 8.0$  Hz), 7.47-7.50 (1H, m), 7.14-7.22 (6H, m), 7.07 (1H, d,  $J = 7.6$

Hz), 5.09 (1H, s, 1H of CH), 4.48 (1H, dd,  $J_1 = 14.4$  Hz,  $J_2 = 6.0$  Hz, 1H of CH<sub>2</sub>), 4.41 (1H, dd,  $J_1 = 14.4$  Hz,  $J_2 = 6.0$  Hz, 1H of CH<sub>2</sub>), 3.80-3.88 (1H, m, 1H of C<sub>3</sub>H<sub>7</sub>), 3.05-3.12 (1H, m, 1H of C<sub>3</sub>H<sub>7</sub>), 1.52-1.65 (2H, m, 2H of C<sub>3</sub>H<sub>7</sub>), 0.83 (3H, t,  $J = 7.2$  Hz, 3H of C<sub>3</sub>H<sub>7</sub>); <sup>13</sup>C NMR (100 MHz, CDCl<sub>3</sub>)  $\delta$  169.3, 168.0, 141.0, 138.1, 131.8, 130.8, 128.7, 128.4, 127.6, 127.2, 123.3, 122.5, 64.6, 43.2, 21.1, 11.2; MS (EI)  $m/z$  308 (M<sup>+</sup>); IR  $\nu_{max}$  (cm<sup>-1</sup>) 1694, 1663, 1548, 1397, 1231, 751, 699; HRMS (EI):  $m/z$  calcd for C<sub>19</sub>H<sub>20</sub>N<sub>2</sub>O<sub>2</sub> (M<sup>+</sup>): 308.1525; Found: 308.1531.

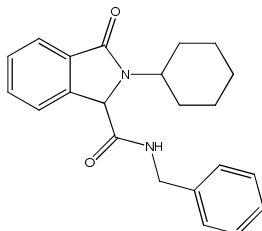

***N*-benzyl-2-cyclohexyl-3-oxoisindoline-1-carboxamide (10d)**

pale solid, mp 174-176 °C. <sup>1</sup>H NMR (400 MHz, CDCl<sub>3</sub>)  $\delta$  7.61 (1H, d,  $J = 7.6$  Hz), 7.50-7.54 (1H, m), 7.10-7.32 (8H, m), 5.11 (1H, s, 1H of CH), 4.44 (1H, dd,  $J_1 = 14.8$  Hz,  $J_2 = 6.8$  Hz, 1H of CH<sub>2</sub>), 4.32 (1H, dd,  $J_1 = 14.4$  Hz,  $J_2 = 6.0$  Hz, 1H of CH<sub>2</sub>), 3.94-4.00 (1H, m, 1H of C<sub>6</sub>H<sub>11</sub>), 1.08-1.93 (10H, m, 10H of C<sub>6</sub>H<sub>11</sub>); <sup>13</sup>C NMR (100 MHz, CDCl<sub>3</sub>)  $\delta$  170.0, 169.2, 141.8, 137.7, 132.0, 131.2, 128.8, 128.4, 127.8, 127.4, 123.5, 122.4, 63.6, 53.6, 43.3, 30.8, 30.7, 25.7, 25.6, 25.1; MS (EI)  $m/z$  348 (M<sup>+</sup>); IR  $\nu_{max}$  (cm<sup>-1</sup>) 1695, 1664, 1544, 1398, 1230, 732, 699; HRMS (EI):  $m/z$  calcd for C<sub>22</sub>H<sub>24</sub>N<sub>2</sub>O<sub>2</sub> (M<sup>+</sup>): 348.1838; Found: 348.1846.

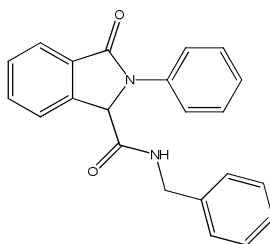

***N*-benzyl-3-oxo-2-phenylisindoline-1-carboxamide (10e)**

pale solid, mp 204-206 °C. <sup>1</sup>H NMR (400 MHz, CDCl<sub>3</sub>)  $\delta$  7.70-7.76 (3H, m), 7.58-7.62 (1H, m), 7.07-7.44 (8H, m), 6.86 (1H, br, 1H of NH), 6.79 (2H, d,  $J = 6.8$  Hz), 5.68 (1H, s, 1H of CH), 4.46 (1H, dd,  $J_1 = 15.2$  Hz,  $J_2 = 6.8$  Hz, 1H of CH<sub>2</sub>), 4.16 (1H, dd,  $J_1 = 15.2$  Hz,  $J_2 = 4.8$  Hz, 1H of CH<sub>2</sub>); <sup>13</sup>C NMR (100 MHz, CDCl<sub>3</sub>)  $\delta$  168.1, 167.6, 140.0, 137.8, 137.4, 132.8, 130.9, 129.3, 129.2, 128.3, 127.2, 127.1, 125.1, 124.1, 122.6, 120.1, 65.5, 43.1; MS (EI)  $m/z$  342 (M<sup>+</sup>); IR  $\nu_{max}$  (cm<sup>-1</sup>) 1704, 1666, 1498, 1368, 733, 695; HRMS (EI):  $m/z$  calcd for C<sub>22</sub>H<sub>18</sub>N<sub>2</sub>O<sub>2</sub> (M<sup>+</sup>): 342.1368; Found: 342.1372.

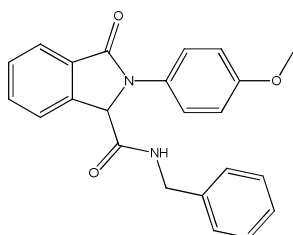

***N*-benzyl-2-(4-methoxyphenyl)-3-oxoisindoline-1-carboxamide (10f)**

pale solid, mp 195-197 °C.  $^1\text{H}$  NMR (400 MHz,  $\text{CDCl}_3$ )  $\delta$  7.69 (1H, d,  $J$  = 7.6 Hz), 7.54-7.56 (3H, m), 7.21-7.29 (3H, m), 7.08-7.14 (3H, m), 6.79-6.85 (4H, m), 5.60 (1H, s, 1H of CH), 4.45 (1H, dd,  $J_1$  = 15.2 Hz,  $J_2$  = 6.8 Hz, 1H of  $\text{CH}_2$ ), 4.18 (1H, dd,  $J_1$  = 15.2 Hz,  $J_2$  = 5.6 Hz, 1H of  $\text{CH}_2$ ), 3.81 (3H, s, 3H of  $\text{CH}_3$ );  $^{13}\text{C}$  NMR (100 MHz,  $\text{CDCl}_3$ )  $\delta$  167.9, 167.7, 157.0, 140.0, 137.6, 132.5, 130.9, 130.8, 129.1, 128.3, 127.2, 127.1, 123.9, 122.5, 122.1, 114.4, 65.9, 55.4, 43.1; MS (EI)  $m/z$  372 ( $\text{M}^+$ ); IR  $\nu_{\text{max}}$  ( $\text{cm}^{-1}$ ) 1700, 1665, 1513, 1378, 1250, 734; HRMS (EI):  $m/z$  calcd for  $\text{C}_{23}\text{H}_{20}\text{N}_2\text{O}_3$  ( $\text{M}^+$ ):372.1474; Found: 372.1469.

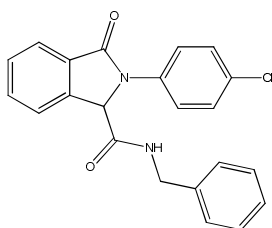

**N-benzyl-2-(4-chlorophenyl)-3-oxoisindoline-1-carboxamide (10g)**

pale solid, mp 198-200 °C.  $^1\text{H}$  NMR (400 MHz,  $\text{CDCl}_3$ )  $\delta$  7.72 (1H, d,  $J$  = 7.6 Hz), 7.58-7.62 (3H, m), 7.32-7.35 (1H, m), 7.11-7.26 (7H, m), 6.85 (2H, d,  $J$  = 7.2 Hz), 5.60 (1H, s, 1H of CH), 4.48 (1H, dd,  $J_1$  = 15.2 Hz,  $J_2$  = 7.2 Hz, 1H of  $\text{CH}_2$ ), 4.18 (1H, dd,  $J_1$  = 15.2 Hz,  $J_2$  = 5.2 Hz, 1H of  $\text{CH}_2$ );  $^{13}\text{C}$  NMR (100 MHz,  $\text{CDCl}_3$ )  $\delta$  168.1, 167.3, 139.9, 137.4, 136.4, 133.1, 130.5, 130.4, 129.3, 129.2, 128.4, 127.4, 127.3, 124.2, 122.6, 121.0, 65.6, 43.2; MS (EI)  $m/z$  376 ( $\text{M}^+$ ); IR  $\nu_{\text{max}}$  ( $\text{cm}^{-1}$ ) 1704, 1666, 1495, 1362, 1093, 735; HRMS (EI):  $m/z$  calcd for  $\text{C}_{22}\text{H}_{17}\text{ClN}_2\text{O}_2$  ( $\text{M}^+$ ):376.0979; Found: 376.0977.

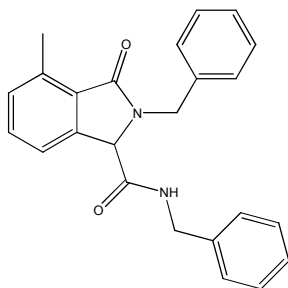

**N,2-dibenzyl-4-methyl-3-oxoisindoline-1-carboxamide (10h)**

pale solid, mp 181-183 °C.  $^1\text{H}$  NMR (400 MHz,  $\text{CDCl}_3$ )  $\delta$  7.36-7.42 (2H, m), 7.16-7.29 (12H, m), 5.25 (1H, d,  $J$  = 14.8 Hz, 1H of  $\text{CH}_2$ ), 4.83 (1H, s, 1H of CH), 4.45 (1H, dd,  $J_1$  = 14.4 Hz,  $J_2$  = 6.0 Hz, 1H of  $\text{CH}_2$ ), 4.30 (1H, dd,  $J_1$  = 14.4 Hz,  $J_2$  = 6.0 Hz, 1H of  $\text{CH}_2$ ), 4.14 (1H, d,  $J$  = 14.4 Hz, 1H of  $\text{CH}_2$ ), 2.32 (3H, s, 3H of  $\text{CH}_3$ );  $^{13}\text{C}$  NMR (100 MHz,  $\text{CDCl}_3$ )  $\delta$  170.0, 167.8, 141.7, 137.9, 137.8, 136.1, 131.9, 130.9, 128.9, 128.5, 128.5, 127.9, 127.7, 127.5, 127.4, 120.1, 63.5, 45.4, 43.4, 16.7; MS (EI)  $m/z$  370 ( $\text{M}^+$ ); IR  $\nu_{\text{max}}$  ( $\text{cm}^{-1}$ ) 1694, 1662, 1547, 1399, 752, 699; HRMS (EI):  $m/z$  calcd for  $\text{C}_{24}\text{H}_{22}\text{N}_2\text{O}_2$  ( $\text{M}^+$ ):370.1681; Found: 370.1679.

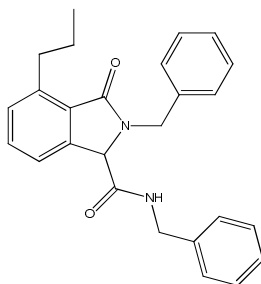

***N*,2-dibenzyl-3-oxo-4-propylisoindoline-1-carboxamide (10i)**

pale solid, mp 142-144 °C.  $^1\text{H}$  NMR (400 MHz,  $\text{CDCl}_3$ )  $\delta$  7.43 (2H, d,  $J$  = 4.0 Hz), 7.20-7.30 (9H, m), 7.11 (2H, d,  $J$  = 7.6 Hz), 6.54 (1H, br, 1H of NH), 5.23 (1H, d,  $J$  = 14.8 Hz, 1H of  $\text{CH}_2$ ), 4.83 (1H, s, 1H of CH), 4.42 (1H, dd,  $J_1$  = 14.4 Hz,  $J_2$  = 6.4 Hz, 1H of  $\text{CH}_2$ ), 4.26 (1H, dd,  $J_1$  = 14.4 Hz,  $J_2$  = 5.2 Hz, 1H of  $\text{CH}_2$ ), 4.17 (1H, d,  $J$  = 14.4 Hz, 1H of  $\text{CH}_2$ ), 3.01-3.08 (1H, m, 1H of  $\text{C}_3\text{H}_7$ ), 2.90-2.97 (1H, m, 1H of  $\text{C}_3\text{H}_7$ ), 1.56-1.70 (2H, m, 2H of  $\text{C}_3\text{H}_7$ ), 0.93 (3H, t,  $J$  = 7.2 Hz, 3H of  $\text{C}_3\text{H}_7$ );  $^{13}\text{C}$  NMR (100 MHz,  $\text{CDCl}_3$ )  $\delta$  170.0, 167.8, 143.0, 141.7, 137.6, 136.1, 131.9, 130.1, 128.9, 128.7, 128.5, 128.0, 127.6, 127.5, 127.1, 120.3, 63.4, 45.6, 43.4, 32.6, 24.2, 13.9; MS (EI)  $m/z$  398 ( $\text{M}^+$ ); IR  $\nu_{\text{max}}$  ( $\text{cm}^{-1}$ ) 1698, 1663, 1549, 1402, 752, 698; HRMS (EI):  $m/z$  calcd for  $\text{C}_{26}\text{H}_{26}\text{N}_2\text{O}_2$  ( $\text{M}^+$ ):398.1994; Found: 398.1998.

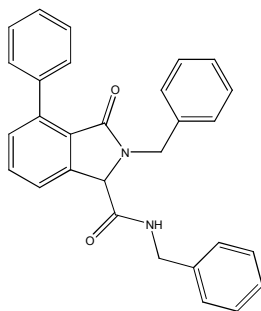

***N*,2-dibenzyl-3-oxo-4-phenylisoindoline-1-carboxamide (10j)**

slurry.  $^1\text{H}$  NMR (400 MHz,  $\text{CDCl}_3$ )  $\delta$  7.64 (1H, d,  $J$  = 7.2 Hz), 7.57 (1H, t,  $J$  = 6.8 Hz), 7.07-7.36 (17H, m), 5.17 (1H, d,  $J$  = 14.8 Hz, 1H of  $\text{CH}_2$ ), 4.82 (1H, s, 1H of CH), 4.41 (1H, dd,  $J_1$  = 14.8 Hz,  $J_2$  = 6.8 Hz, 1H of  $\text{CH}_2$ ), 4.00 (1H, d,  $J$  = 14.4 Hz, 1H of  $\text{CH}_2$ ), 3.91 (1H, dd,  $J_1$  = 14.4 Hz,  $J_2$  = 4.8 Hz, 1H of  $\text{CH}_2$ );  $^{13}\text{C}$  NMR (100 MHz,  $\text{CDCl}_3$ )  $\delta$  168.5, 167.4, 142.3, 141.1, 138.0, 137.2, 135.8, 131.9, 131.3, 129.4, 128.8, 128.6, 128.5, 127.9, 127.8, 127.7, 127.5, 127.3, 126.3, 121.8, 63.0, 45.5, 43.4; MS (EI)  $m/z$  432 ( $\text{M}^+$ ); IR  $\nu_{\text{max}}$  ( $\text{cm}^{-1}$ ) 1696, 1666, 1541, 1397, 754, 698; HRMS (EI):  $m/z$  calcd for  $\text{C}_{29}\text{H}_{24}\text{N}_2\text{O}_2$  ( $\text{M}^+$ ):432.1838; Found: 432.1837.

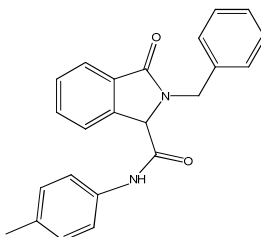

**2-benzyl-3-oxo-*N*-*p*-tolylisoindoline-1-carboxamide (10k)**

pale solid, mp 203-205 °C.  $^1\text{H}$  NMR (400 MHz,  $\text{CDCl}_3$ )  $\delta$  9.45 (1H, br, 1H of NH), 7.62-7.66 (3H, m), 7.45-7.49 (1H, m), 7.23-7.33 (7H, m), 7.09 (2H, d,  $J$  = 8.4 Hz),

5.42 (1H, d,  $J = 14.4$  Hz, 1H of CH<sub>2</sub>), 5.01 (1H, s, 1H of CH), 4.40 (1H, d,  $J = 14.8$  Hz, 1H of CH<sub>2</sub>), 2.30 (3H, s, 3H of CH<sub>3</sub>); <sup>13</sup>C NMR (100 MHz, CDCl<sub>3</sub>)  $\delta$  169.7, 165.8, 141.0, 135.8, 135.3, 134.1, 132.3, 130.5, 129.3, 129.0, 128.9, 128.5, 128.0, 123.4, 122.8, 120.1, 65.0, 45.9, 20.8; MS (EI)  $m/z$  356 (M<sup>+</sup>); IR  $\nu_{max}$  (cm<sup>-1</sup>) 1700, 1663, 1608, 1538, 1406, 731; HRMS (EI):  $m/z$  calcd for C<sub>23</sub>H<sub>20</sub>N<sub>2</sub>O<sub>2</sub> (M<sup>+</sup>):356.1525; Found: 356.1518.

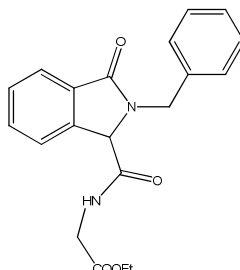

**ethyl 2-(2-benzyl-3-oxoisindoline-1-carboxamido)acetate (10l)**

pale solid, mp 131-133 °C. <sup>1</sup>H NMR (400 MHz, CDCl<sub>3</sub>)  $\delta$  7.83 (1H, br, 1H of NH), 7.58-7.61 (2H, m), 7.50-7.54 (1H, m), 7.39-7.41 (1H, m), 7.24-7.28 (5H, m), 5.37 (1H, d,  $J = 14.8$  Hz, 1H of CH<sub>2</sub>), 4.89 (1H, s, 1H of CH), 4.39 (1H, d,  $J = 14.8$  Hz, 1H of CH<sub>2</sub>), 4.20 (1H, dd,  $J_1 = 13.6$  Hz,  $J_2 = 6.4$  Hz, 1H of CH<sub>2</sub>), 4.15-4.23 (2H, m, 2H of C<sub>2</sub>H<sub>5</sub>), 3.87 (1H, dd,  $J_1 = 17.6$  Hz,  $J_2 = 5.2$  Hz, 1H of CH<sub>2</sub>), 1.25 (3H, t,  $J = 7.2$  Hz, 3H of C<sub>2</sub>H<sub>5</sub>); <sup>13</sup>C NMR (100 MHz, CDCl<sub>3</sub>)  $\delta$  169.4, 169.3, 168.2, 140.9, 136.0, 132.2, 130.6, 129.0, 128.8, 128.5, 127.9, 123.7, 122.8, 63.6, 61.3, 45.2, 41.1, 14.1; MS (EI)  $m/z$  352 (M<sup>+</sup>); IR  $\nu_{max}$  (cm<sup>-1</sup>) 1700, 1663, 1608, 1538, 1406, 731; HRMS (EI):  $m/z$  calcd for C<sub>20</sub>H<sub>20</sub>N<sub>2</sub>O<sub>4</sub> (M<sup>+</sup>):352.1423; Found: 352.1426.

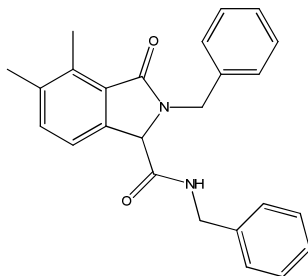

**N,2-dibenzyl-4,5-dimethyl-3-oxoisindoline-1-carboxamide (10m)**

pale solid, mp 153-155 °C. <sup>1</sup>H NMR (400 MHz, CDCl<sub>3</sub>)  $\delta$  7.20-7.31 (10H, m), 7.13 (2H, d,  $J = 7.2$  Hz), 6.73 (1H, br, 1H of NH), 5.24 (1H, d,  $J = 14.4$  Hz, 1H of CH<sub>2</sub>), 4.79 (1H, s, 1H of CH), 4.42 (1H, dd,  $J_1 = 14.4$  Hz,  $J_2 = 6.4$  Hz, 1H of CH<sub>2</sub>), 4.26 (1H, dd,  $J_1 = 14.8$  Hz,  $J_2 = 5.6$  Hz, 1H of CH<sub>2</sub>), 4.15 (1H, d,  $J = 14.4$  Hz, 1H of CH<sub>2</sub>), 2.41 (3H, s, 3H of CH<sub>3</sub>), 2.28 (3H, s, 3H of CH<sub>3</sub>); <sup>13</sup>C NMR (100 MHz, CDCl<sub>3</sub>)  $\delta$  170.5, 168.1, 139.3, 138.4, 137.7, 136.8, 136.2, 133.4, 128.9, 128.6, 128.5, 127.9, 127.7, 127.5, 127.3, 119.7, 62.9, 45.6, 43.4, 19.2, 12.6; MS (EI)  $m/z$  384 (M<sup>+</sup>); IR  $\nu_{max}$  (cm<sup>-1</sup>) 1691, 1661, 1543, 1391, 1238, 698; HRMS (EI):  $m/z$  calcd for C<sub>25</sub>H<sub>24</sub>N<sub>2</sub>O<sub>2</sub> (M<sup>+</sup>):384.1838; Found: 384.1833.



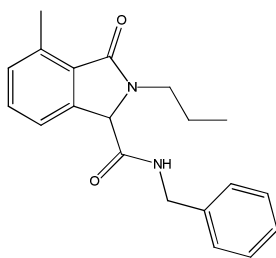

**N-benzyl-4-methyl-3-oxo-2-propylisoindoline-1-carboxamide (10n)**

pale solid, mp 111-113 °C.  $^1\text{H}$  NMR (400 MHz,  $\text{CDCl}_3$ )  $\delta$  7.47 (1H, d,  $J = 7.6$  Hz), 7.39-7.43 (1H, m), 7.21-7.26 (3H, m), 7.13-7.16 (3H, m), 7.02 (1H, br, 1H of NH), 5.04 (1H, s, 1H of CH), 4.50 (1H, dd,  $J_1 = 14.8$  Hz,  $J_2 = 6.8$  Hz, 1H of  $\text{CH}_2$ ), 4.29 (1H, dd,  $J_1 = 14.4$  Hz,  $J_2 = 5.2$  Hz, 1H of  $\text{CH}_2$ ), 3.84-3.91 (1H, m, 1H of  $\text{C}_3\text{H}_7$ ), 3.03-3.10 (1H, m, 1H of  $\text{C}_3\text{H}_7$ ), 2.31 (3H, s, 3H of  $\text{CH}_3$ ), 1.56-1.65 (2H, m, 2H of  $\text{C}_3\text{H}_7$ ), 0.87 (3H, t,  $J = 7.2$  Hz, 3H of  $\text{C}_3\text{H}_7$ );  $^{13}\text{C}$  NMR (100 MHz,  $\text{CDCl}_3$ )  $\delta$  170.2, 168.2, 141.5, 137.8, 131.7, 131.0, 128.5, 127.9, 127.6, 127.4, 120.1, 64.1, 43.4, 43.2, 21.1, 16.7, 11.3; MS (EI)  $m/z$  322 ( $\text{M}^+$ ); IR  $\nu_{\text{max}}$  ( $\text{cm}^{-1}$ ) 1698, 1664, 1521, 1377, 751, 700; HRMS (EI):  $m/z$  calcd for  $\text{C}_{20}\text{H}_{22}\text{N}_2\text{O}_2$  ( $\text{M}^+$ ):322.1681; Found: 322.1687.

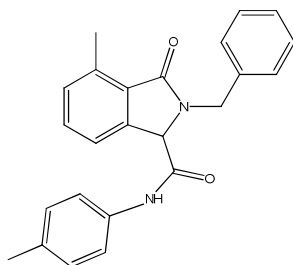

**2-benzyl-4-methyl-3-oxo-N-p-tolylisoindoline-1-carboxamide (10o)**

pale solid, mp 226-228 °C.  $^1\text{H}$  NMR (400 MHz,  $\text{CDCl}_3$ )  $\delta$  9.04 (1H, br, 1H of NH), 7.56 (2H, d,  $J = 8.8$  Hz), 7.48 (1H, d,  $J = 7.6$  Hz), 7.36-7.40 (1H, m), 7.28-7.32 (5H, m), 7.08-7.10 (3H, m), 5.47 (1H, d,  $J = 14.4$  Hz, 1H of  $\text{CH}_2$ ), 4.96 (1H, s, 1H of CH), 4.40 (1H, d,  $J = 14.8$  Hz, 1H of  $\text{CH}_2$ ), 2.30 (3H, s, 3H of  $\text{CH}_3$ ), 2.11 (3H, s, 3H of  $\text{CH}_3$ );  $^{13}\text{C}$  NMR (100 MHz,  $\text{CDCl}_3$ )  $\delta$  170.2, 166.0, 141.5, 138.0, 136.0, 135.2, 134.1, 132.0, 131.0, 129.3, 129.0, 128.6, 128.0, 127.5, 120.3, 120.1, 64.5, 45.8, 20.8, 16.5; MS (EI)  $m/z$  370 ( $\text{M}^+$ ); IR  $\nu_{\text{max}}$  ( $\text{cm}^{-1}$ ) 1703, 1604, 1515, 1481, 1405, 736; HRMS (EI):  $m/z$  calcd for  $\text{C}_{24}\text{H}_{22}\text{N}_2\text{O}_2$  ( $\text{M}^+$ ):370.1681; Found: 370.1677.

### 3. $^1\text{H}$ NMR and $^{13}\text{C}$ NMR spectra

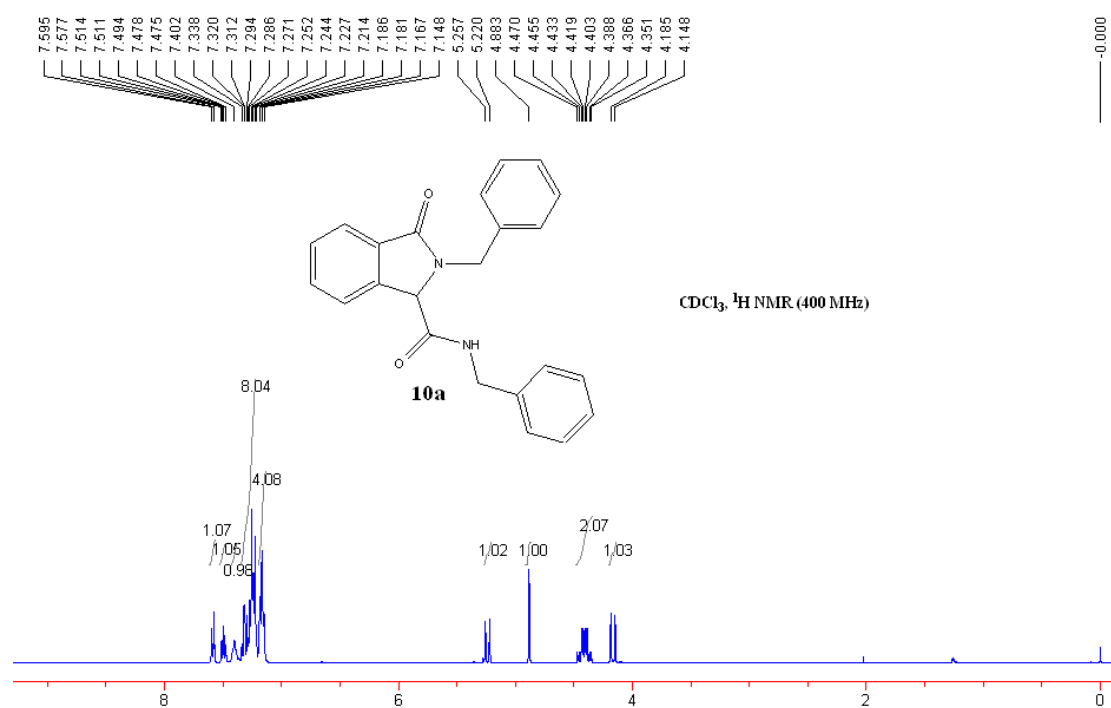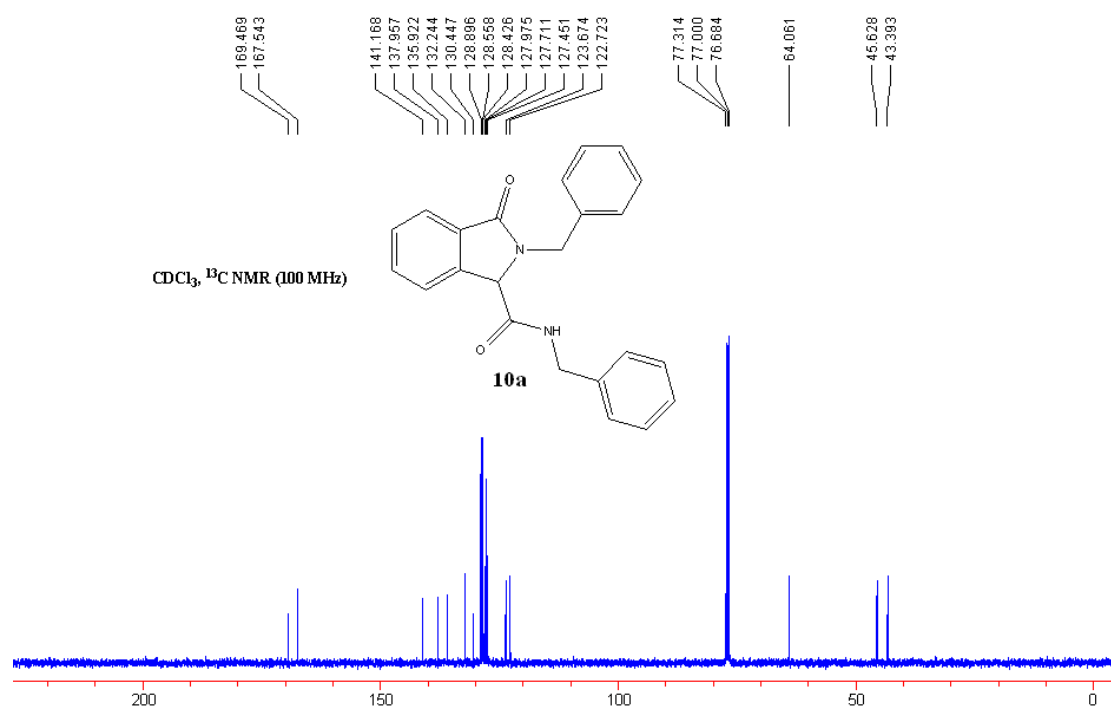

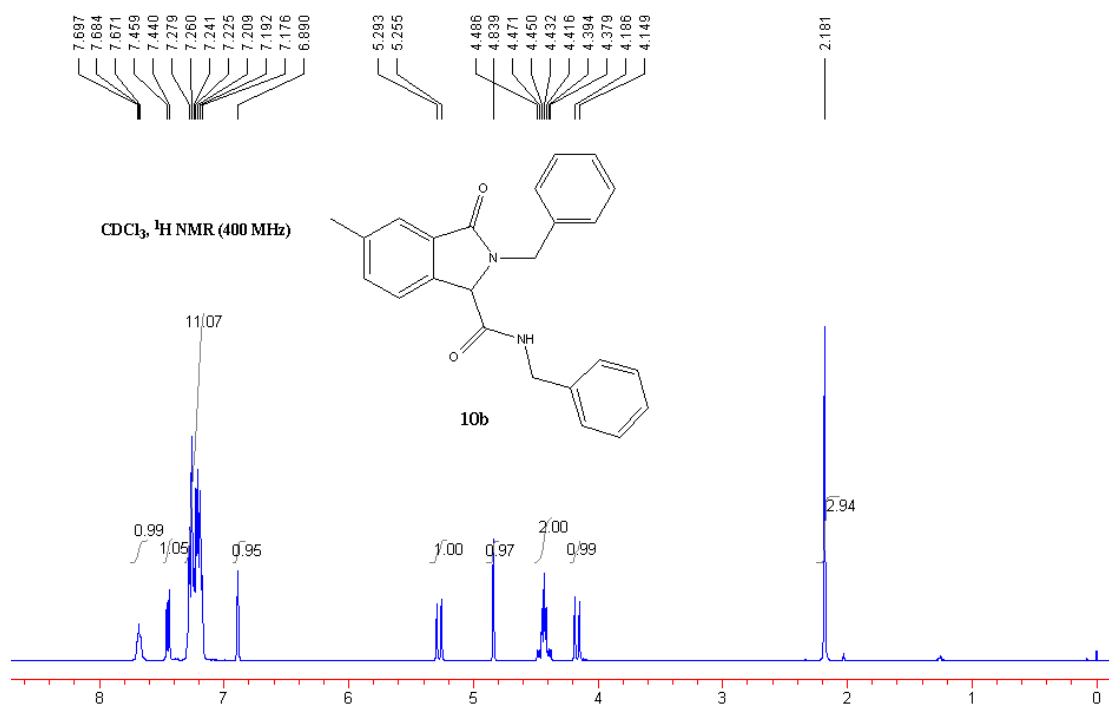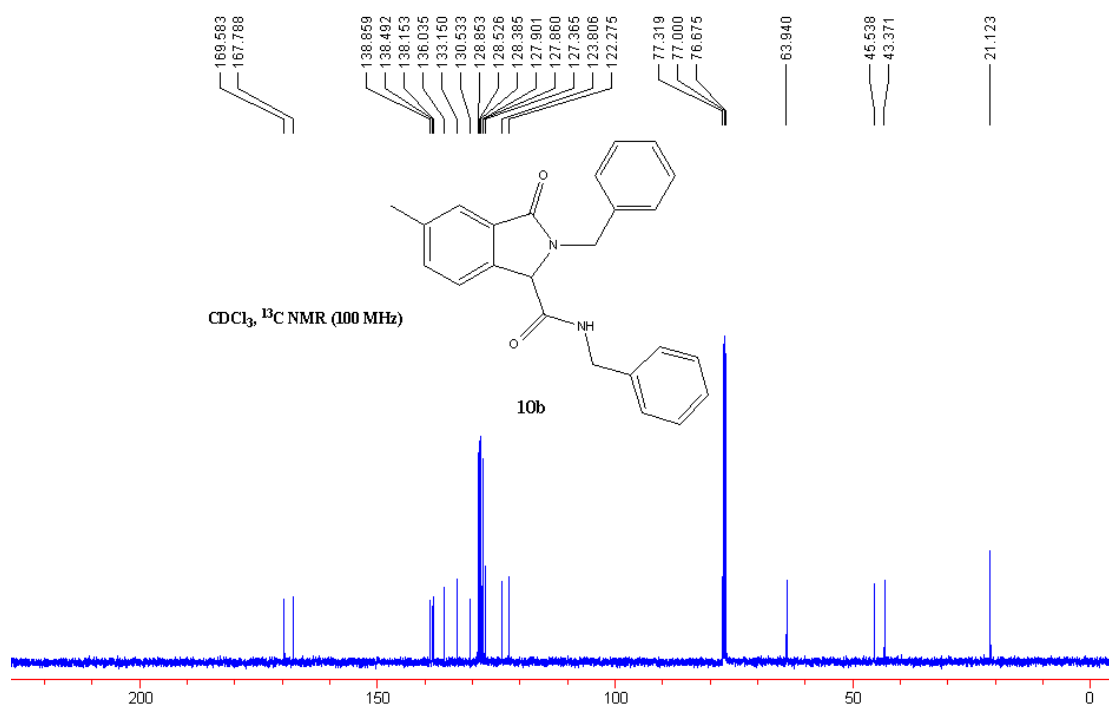

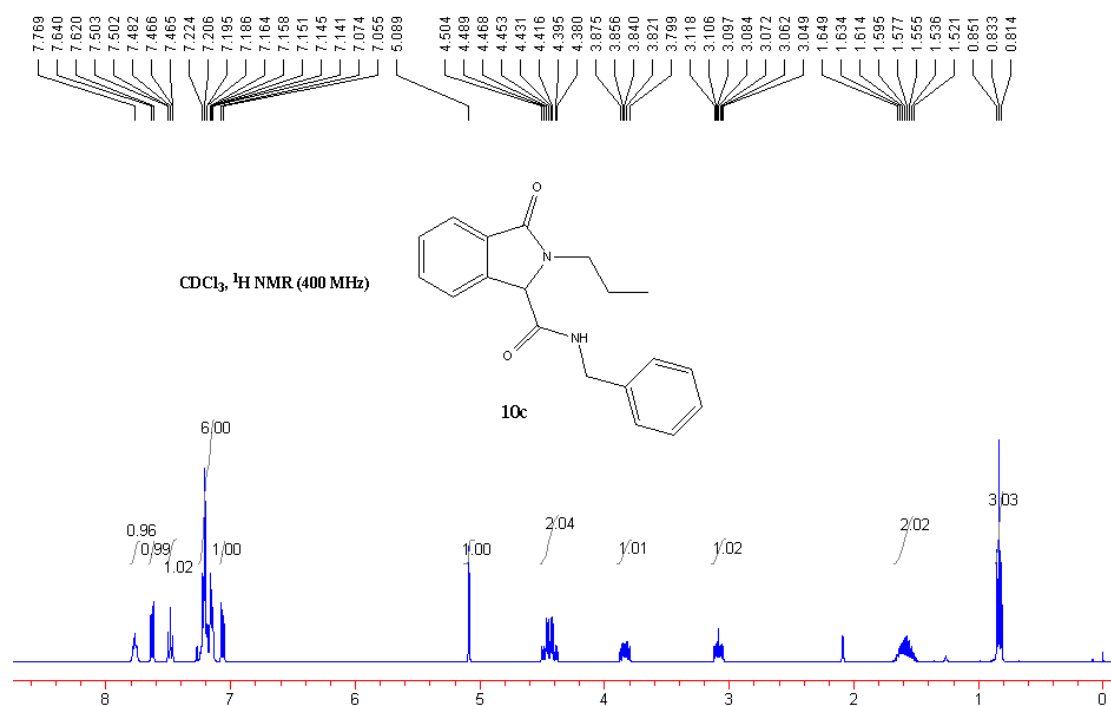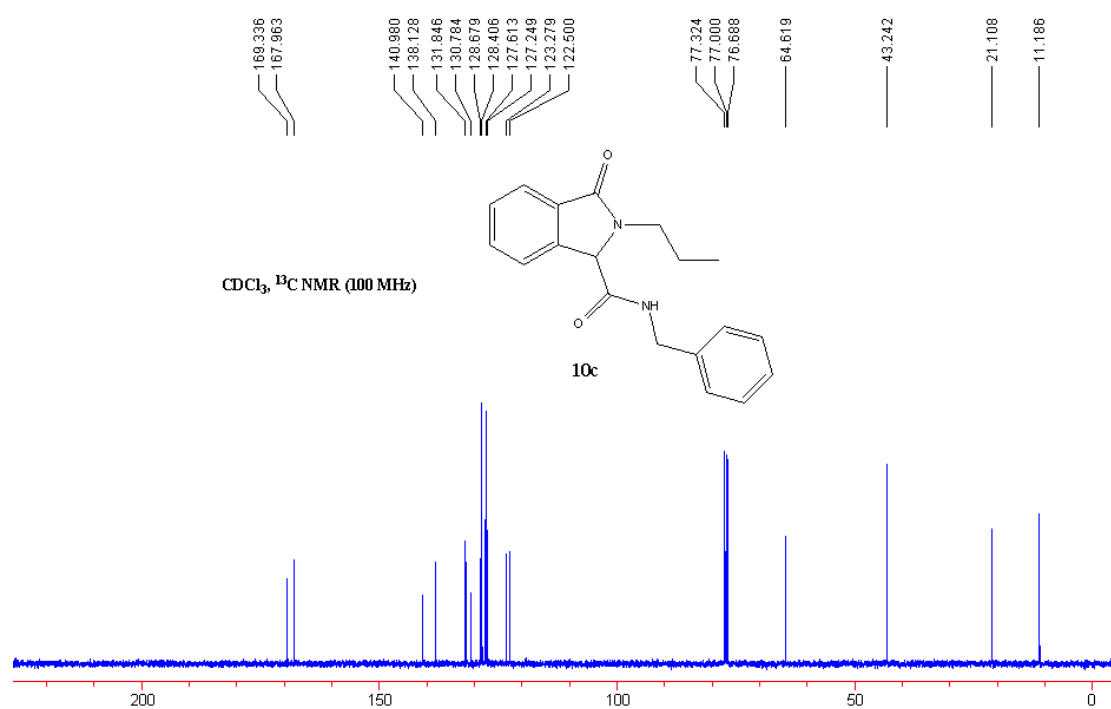

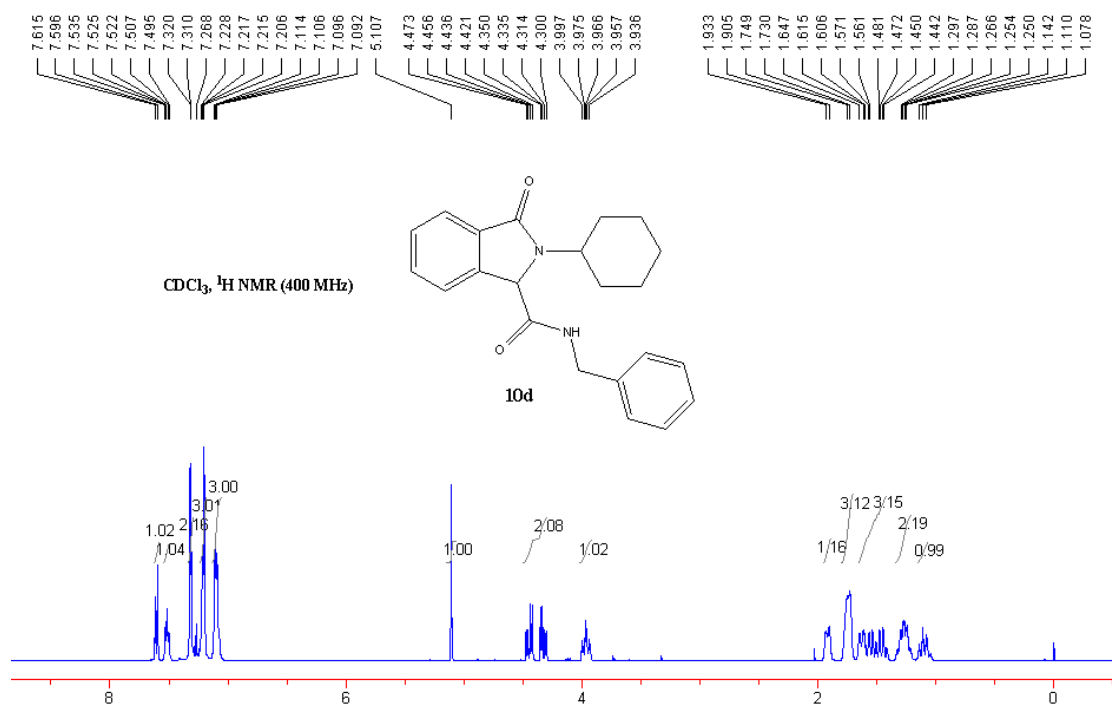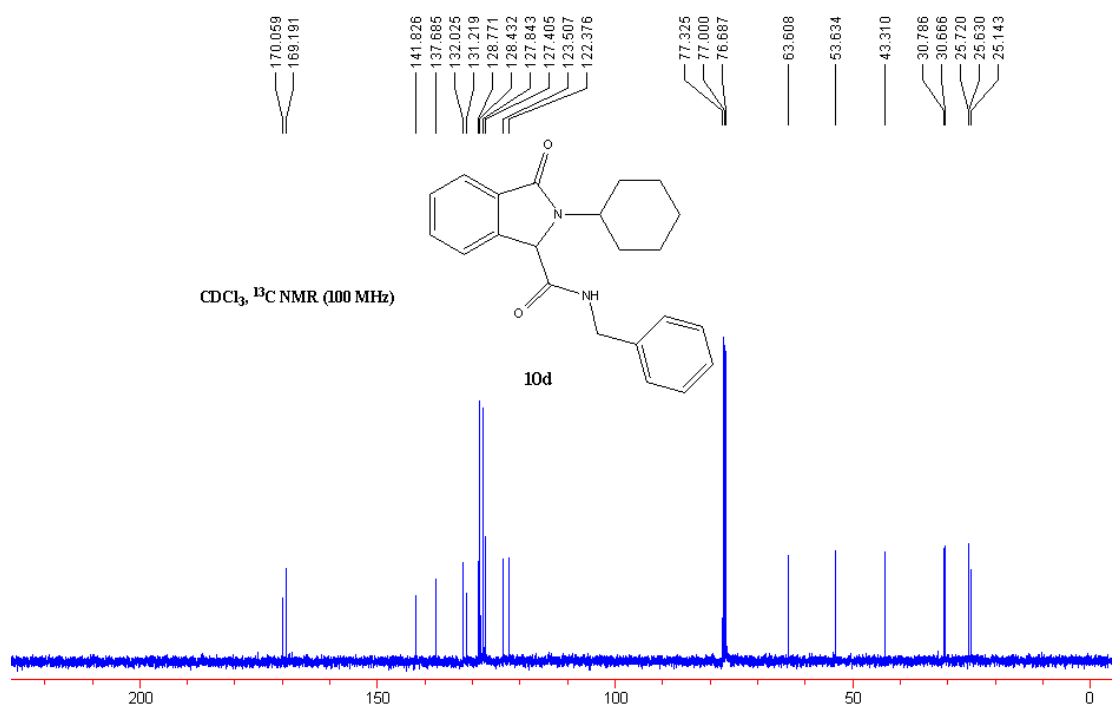

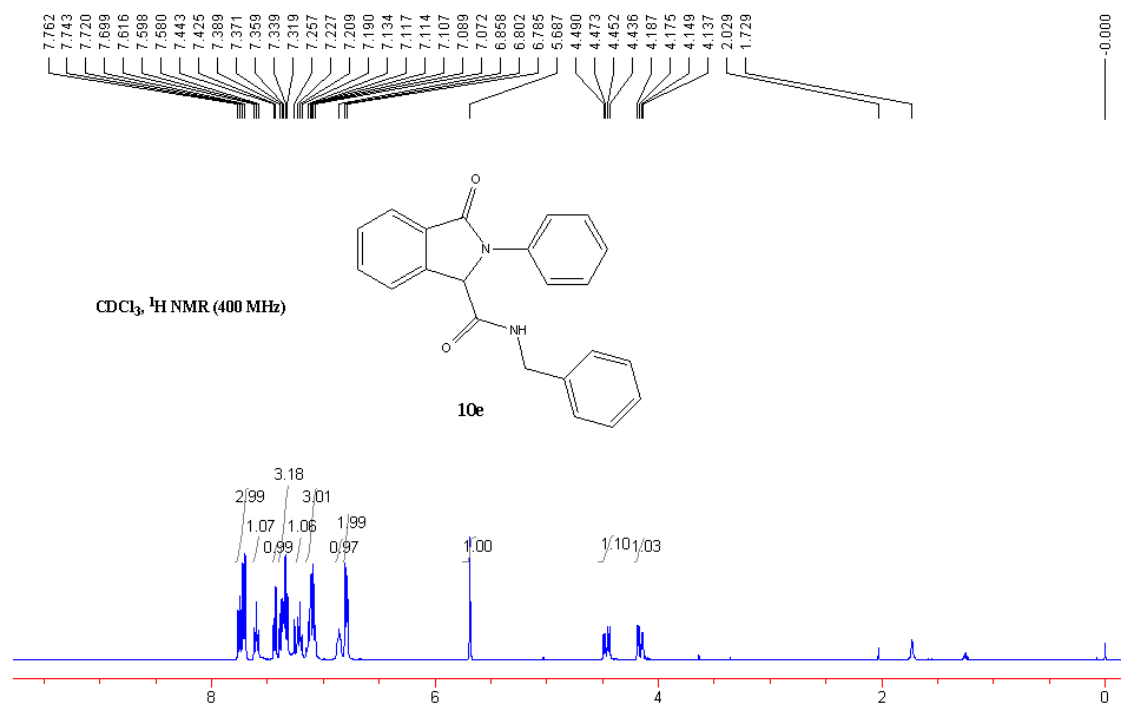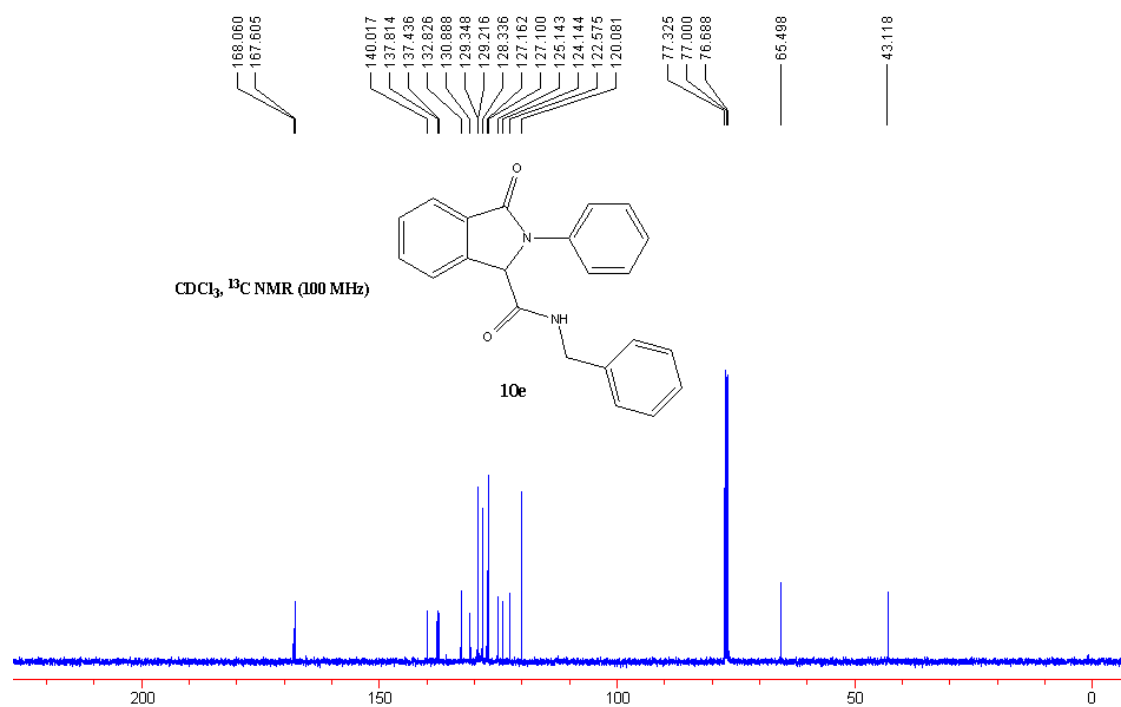

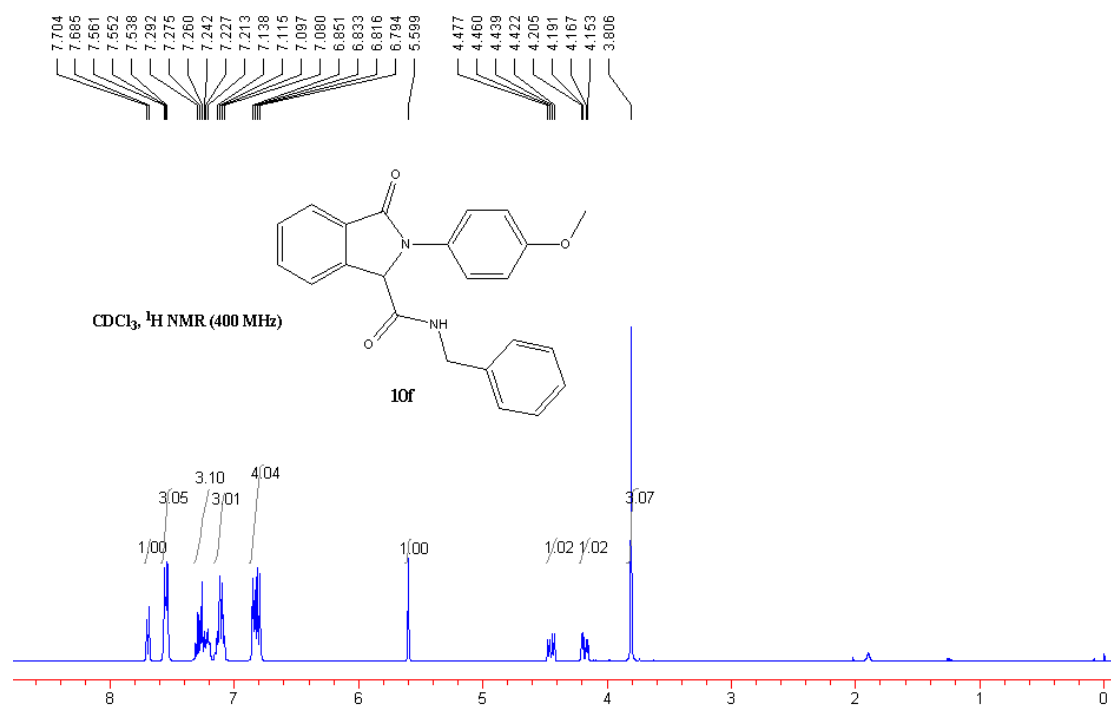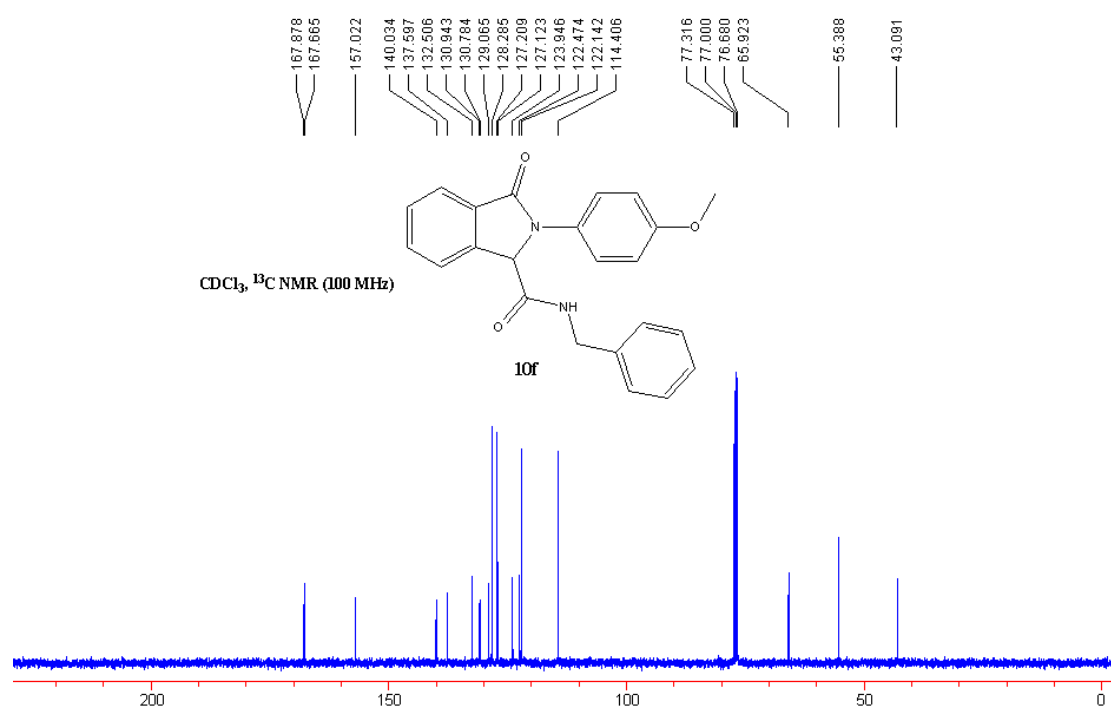

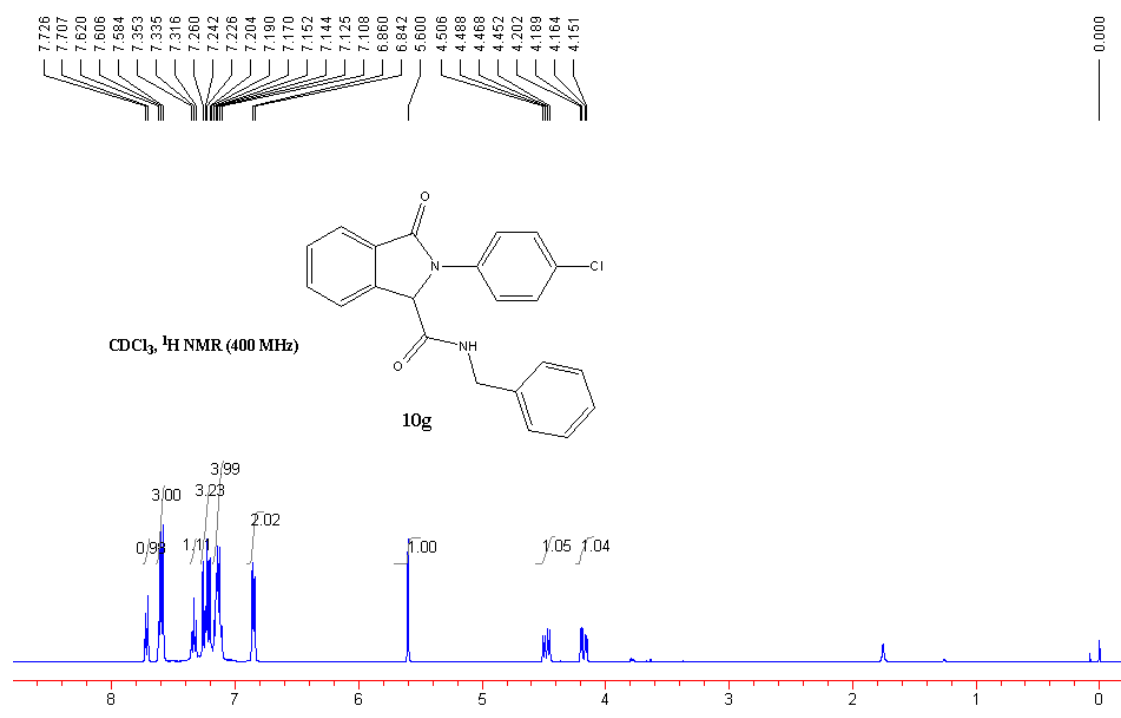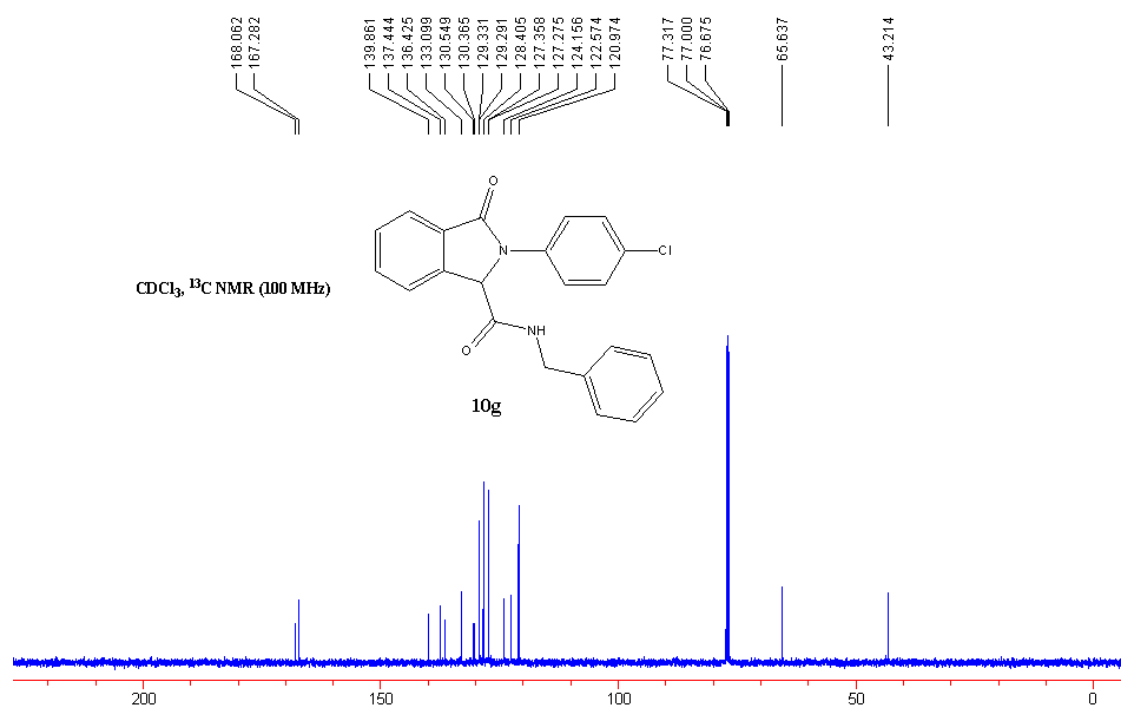



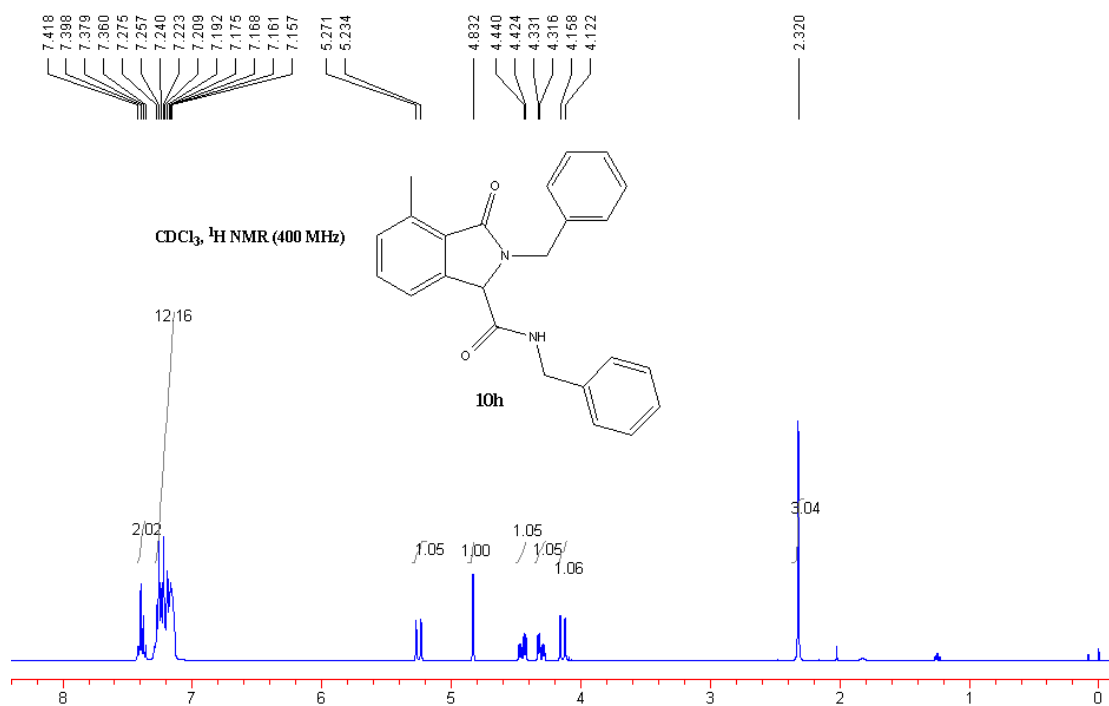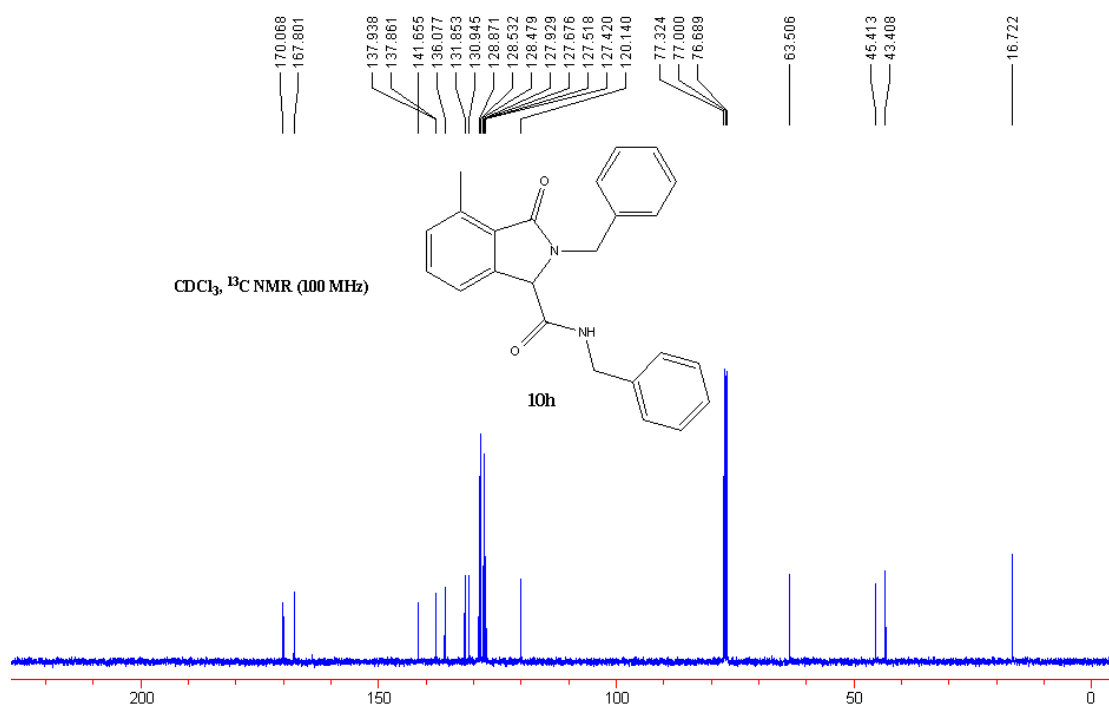

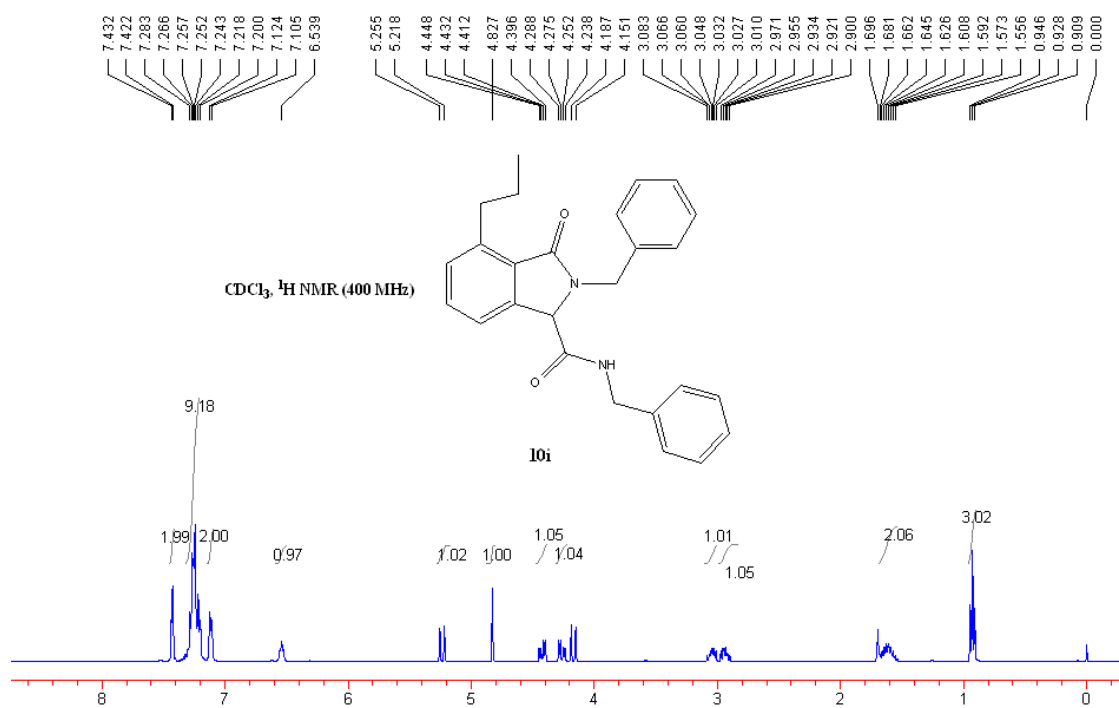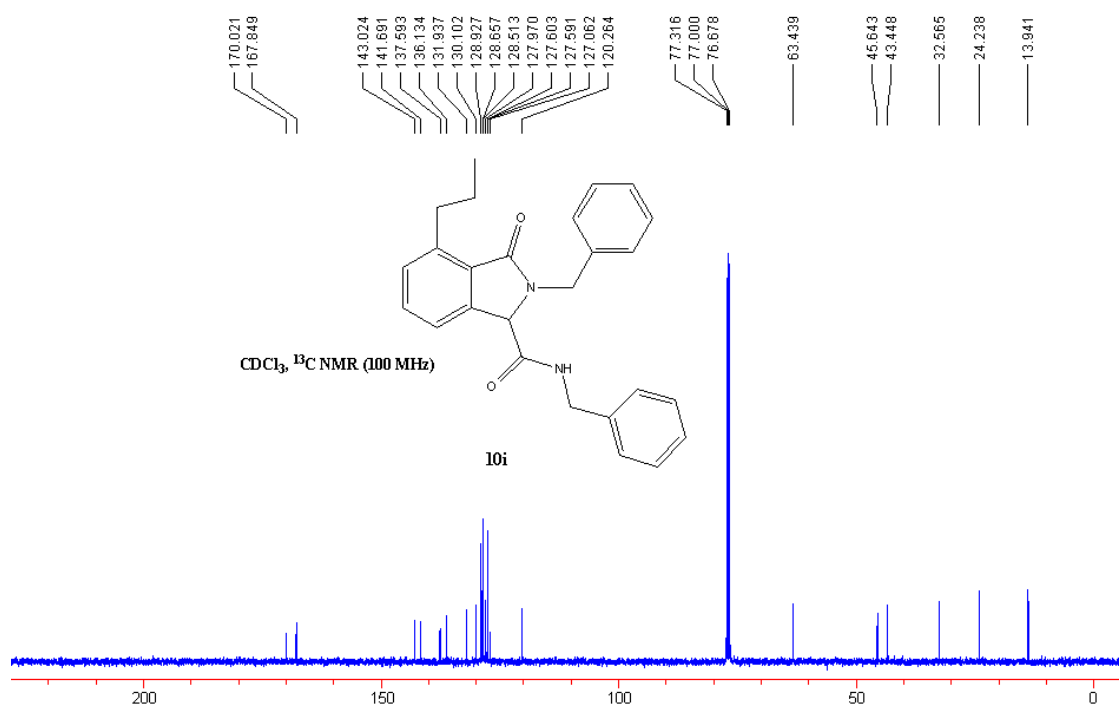

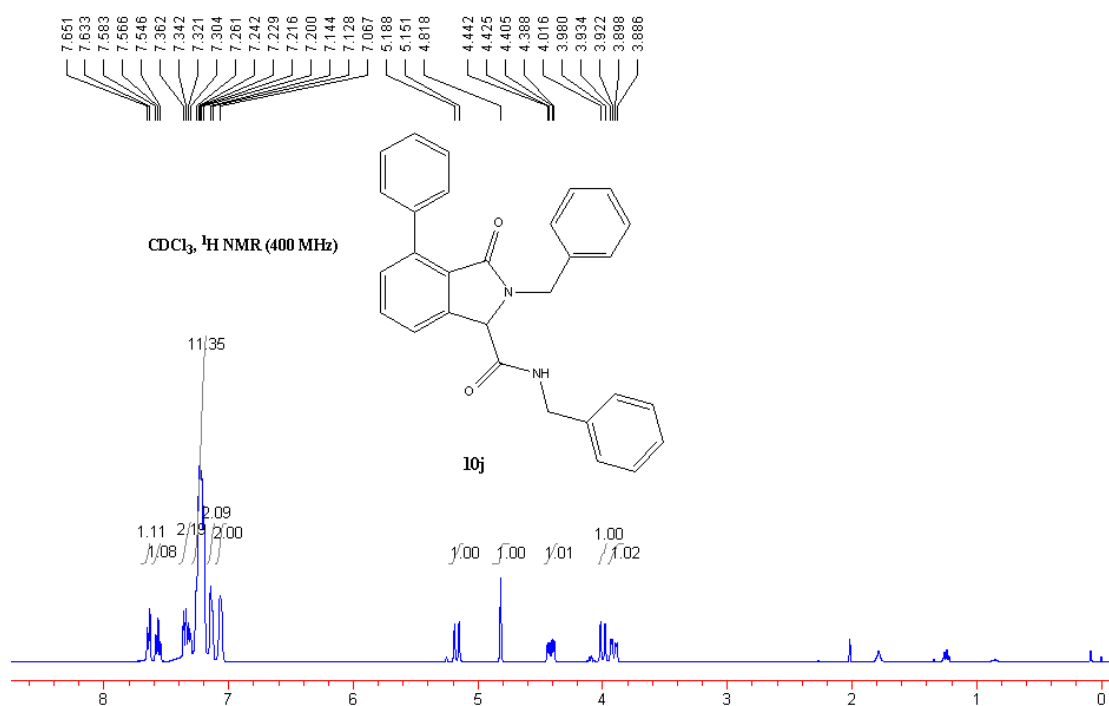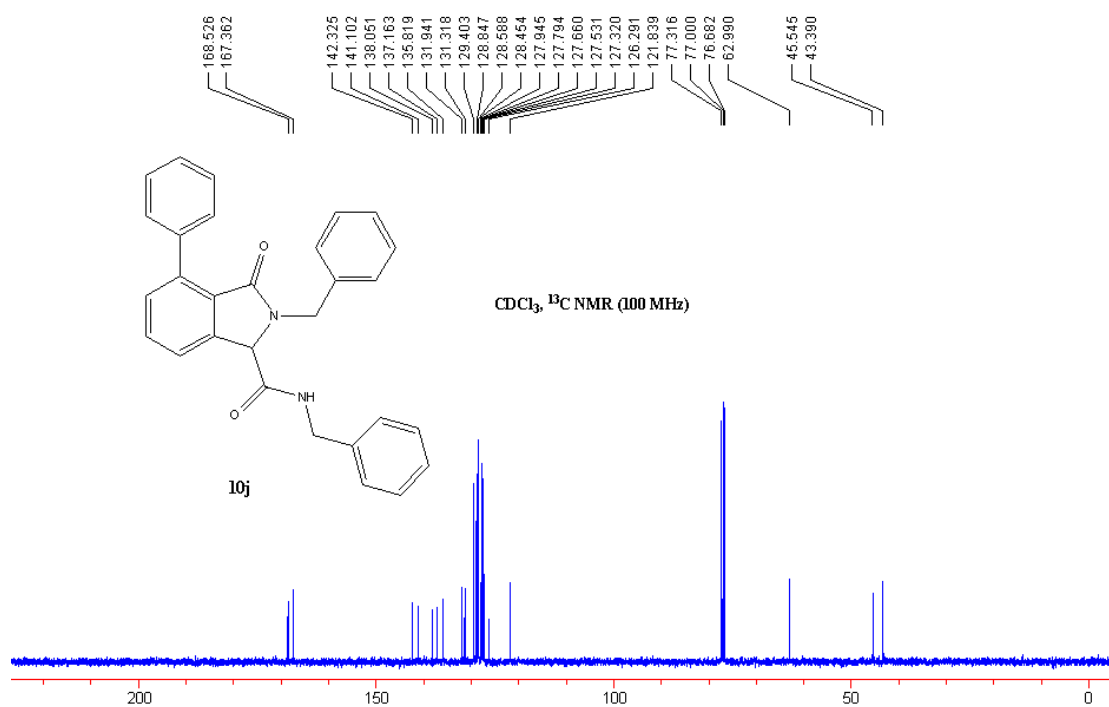

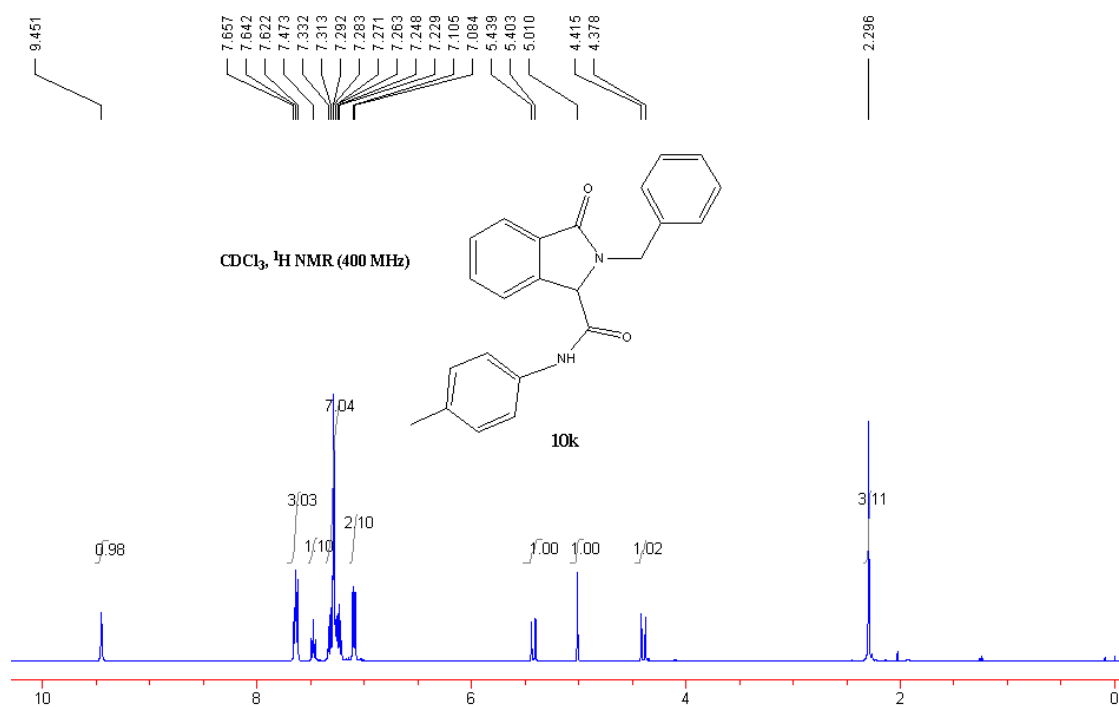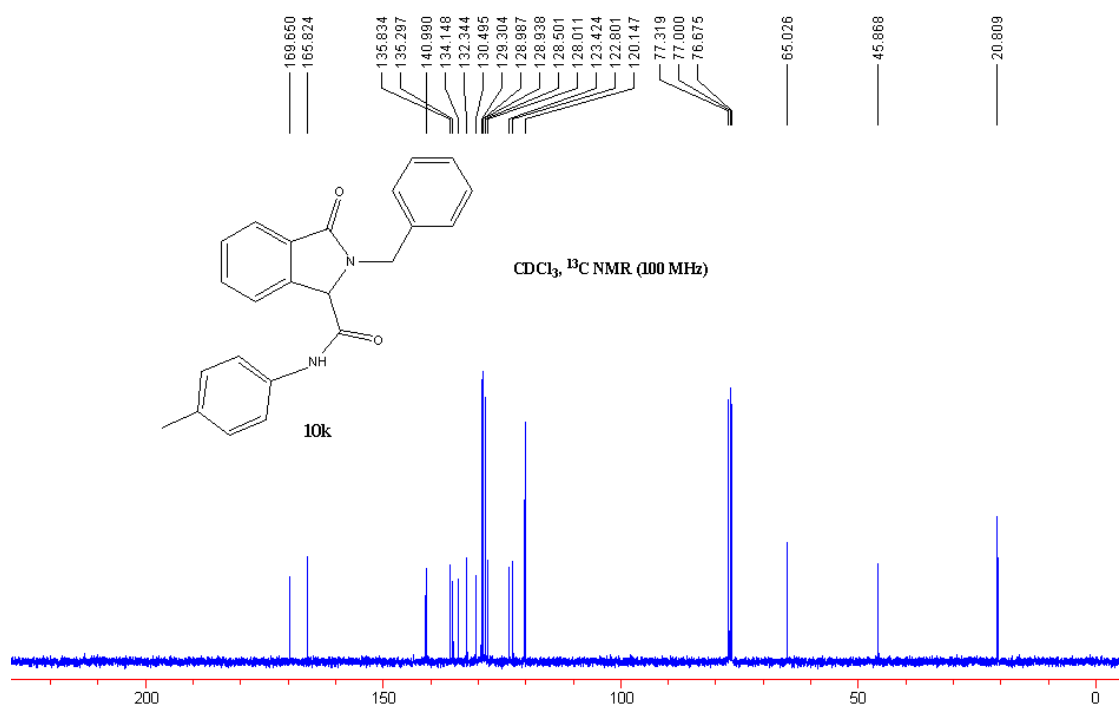

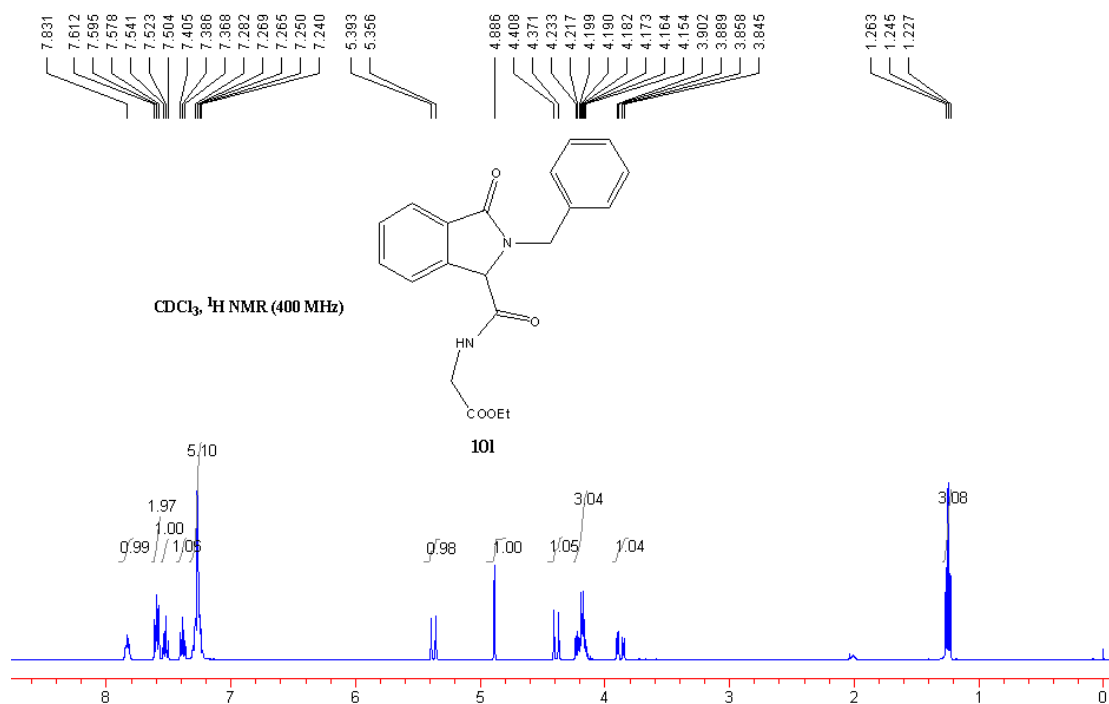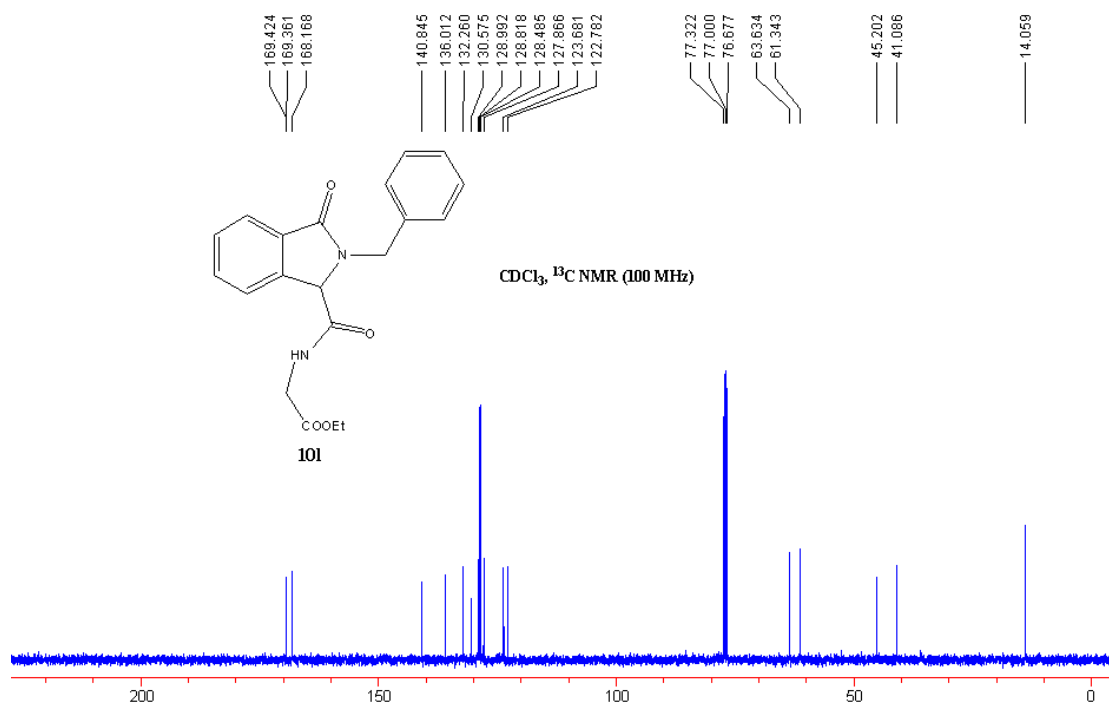

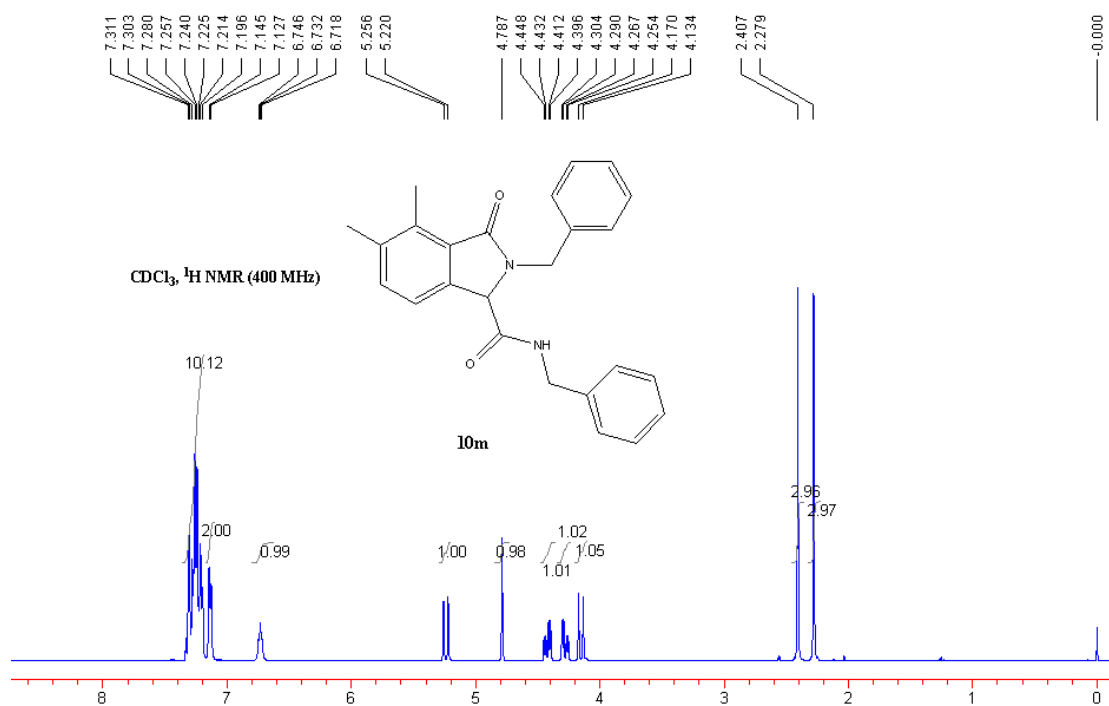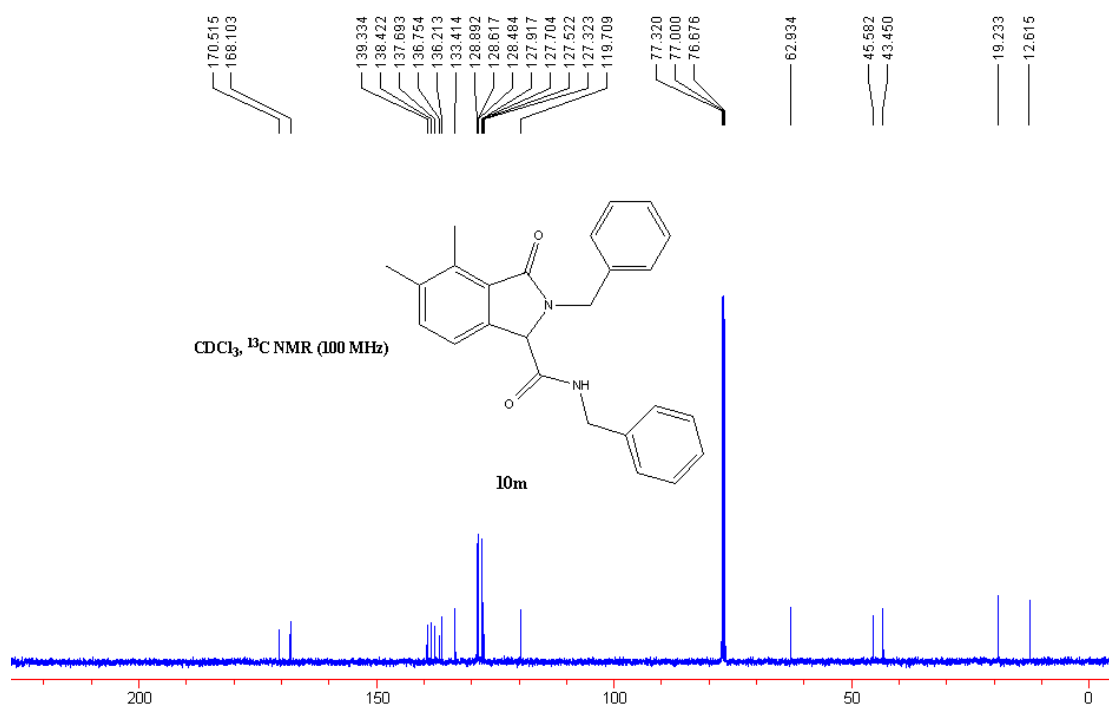

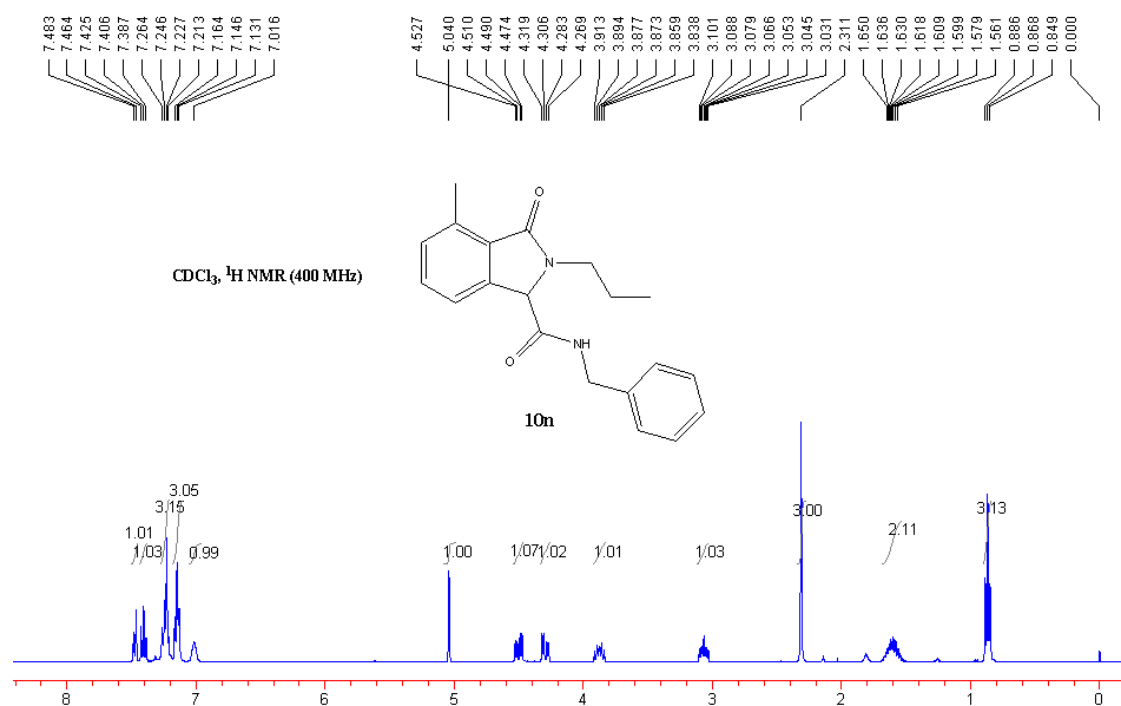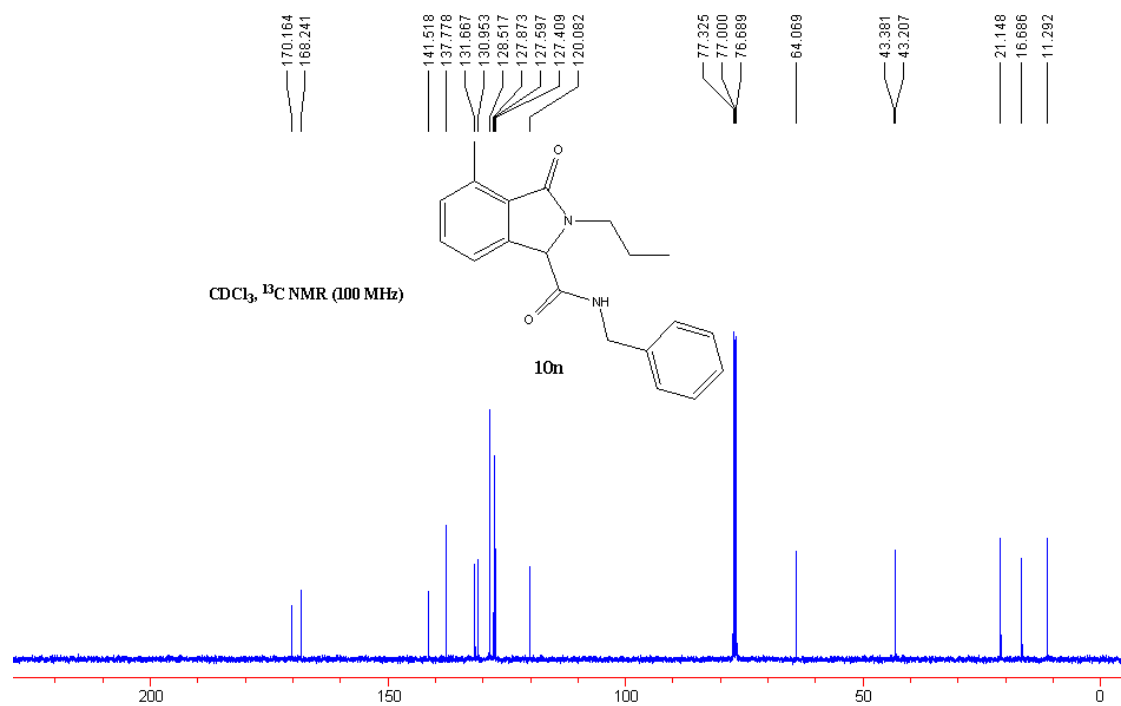

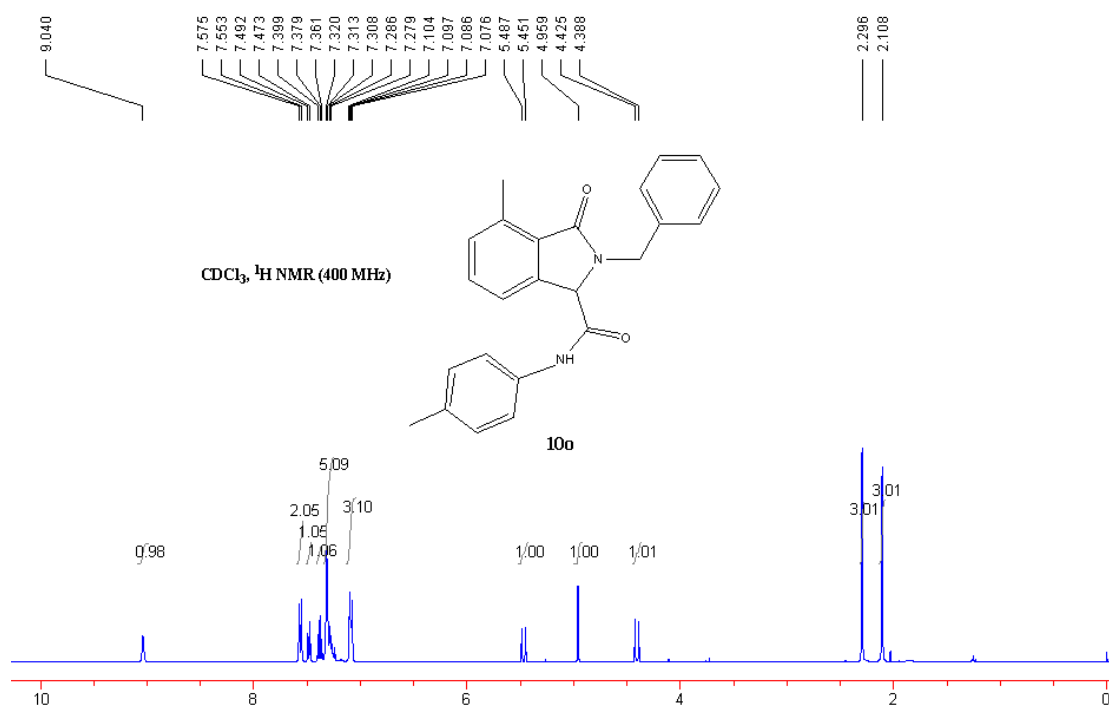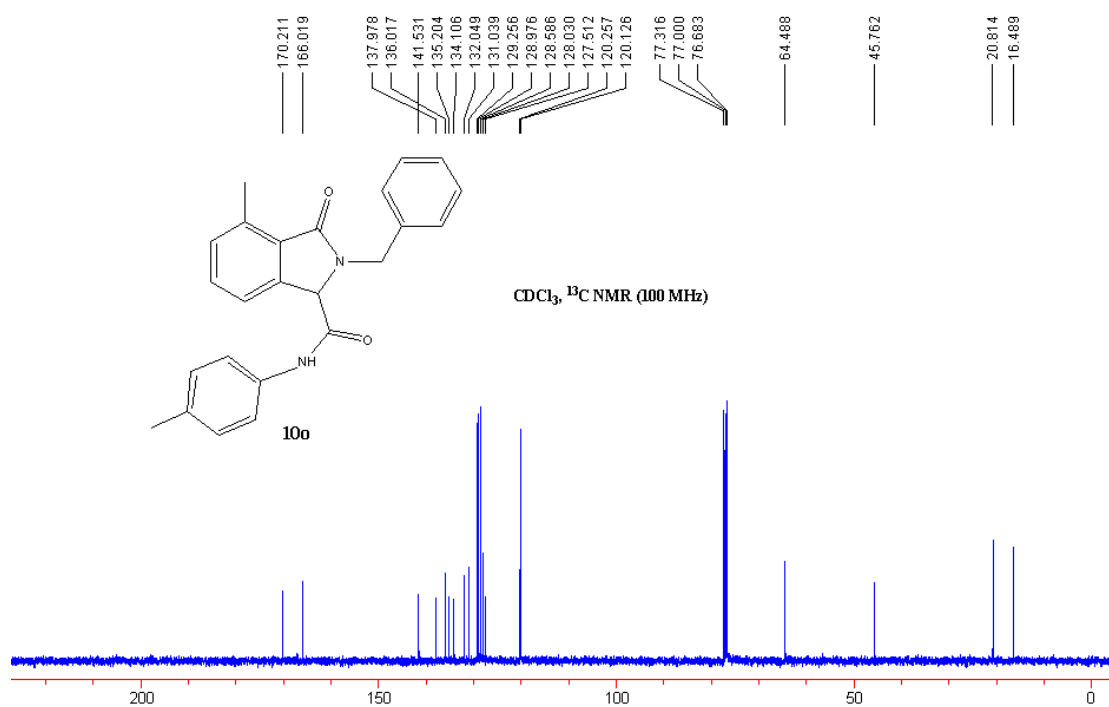

Supplement: Supplementary file 1 [file 4506049]
